# 1           **Sibling rivalry among the ZBTB transcription factor family:** 2                                   **homo vs. heterodimers**

3  
4 Sofia Piepoli<sup>a,b</sup>, Liyne Nogay<sup>a,c</sup>, Umit Akkose<sup>a</sup>, Sarah Barakat<sup>a</sup>, Hakan Taskiran<sup>a,c</sup>,  
5 Nazife Tolay<sup>a,d</sup>, Melike Gezen<sup>a</sup>, Ogun Adebali<sup>a</sup>, Canan Atilgan<sup>a</sup> and Batu Erman<sup>b</sup>

6  
7 <sup>a</sup>Faculty of Engineering and Natural Sciences, Sabanci University, 34956 Tuzla,  
8 Istanbul, Turkey

9 <sup>b</sup>Department of Molecular Biology and Genetics, Faculty of Arts and Sciences,  
10 Bogazici University, 34342 Bebek, Istanbul, Turkey

11 <sup>c</sup>Max Planck Institute of Immunobiology and Epigenetics, Stübeweg 51, 79108  
12 Freiburg im Breisgau, Germany.

13 <sup>d</sup>Department of Biochemistry, Biocenter, University of Würzburg, Würzburg, Germany

14  
15 **Keywords:** ZBTB Transcription factor, BTB domain, homodimer, heterodimer, binding  
16 free energy, MM-GBSA

## 17 18 19 **Abstract**

20  
21 The BTB domain is an oligomerization domain found in over 200 proteins encoded in  
22 the human genome. In the family of BTB domain and Zinc Finger-containing (ZBTB)  
23 transcription factors, 49 members share the same protein architecture. The N-terminal  
24 BTB domain is structurally conserved among the family members and serves as the  
25 dimerization site while the C-terminal zinc finger motifs mediate DNA binding. The  
26 available BTB domain structures from this family reveal a natural inclination for  
27 homodimerization. In this study we investigated the potential for heterodimer formation  
28 in the cellular environment. We selected five BTB homodimers and four heterodimer  
29 structures. We performed *in vitro* binding assays with fluorescent protein-BTB domain  
30 fusions to assess dimer formation. We tested the binding of several BTB pairs, and  
31 we were able to confirm the heterodimeric physical interaction between the BTB  
32 domains of PATZ1 and PATZ2, previously reported only in an interactome mapping  
33 experiment. We also found this pair to be co-expressed in several immune system cell  
34 types. Finally, we used the available structures of BTB domain dimers and newly  
35 constructed models in extended molecular dynamics simulations (500 ns) to  
36 understand the energetic determinants of homo and heterodimer formation. We  
37 conclude that heterodimer formation, although frequently described as less preferred  
38 than homodimers, is a possible mechanism to increase the combinatorial specificity of  
39 this transcription factor family.

## 40 Introduction

41

42 BTB (Broad complex, Tramtrack and Bric-à-brac) domains are protein-protein  
43 interaction domains that are found in about 200 human genome encoded proteins  
44 including the N-termini of 49 Zinc finger and BTB (ZBTB) proteins<sup>1, 2</sup>. The X-ray  
45 structures of the 9 members of this family that have been solved to date are from  
46 ZBTB7a (LRF)<sup>3</sup>, ZBTB16 (PLZF)<sup>4</sup>, ZBTB17 (MIZ1) and ZBTB32 (FAZF)<sup>5</sup>, ZBTB19  
47 (PATZ1)<sup>6</sup>, ZBTB27 (BCL6)<sup>7</sup>, ZBTB31 (MYNN)<sup>8</sup>, ZBTB33 (KAISO)<sup>9</sup>, ZBTB48 (HKR3)<sup>10</sup>.  
48 These structures indicate that the BTB domain forms obligate dimers. Dimerization  
49 likely facilitates target DNA binding through the C-terminal zinc finger motifs found in  
50 the DNA binding domains of these ZBTB transcription factors<sup>11</sup>. In addition to  
51 mediating homodimerization, the BTB dimer forms a scaffold for other ligands that  
52 modify the transcriptional regulation of target genes<sup>12</sup>.

53

54 We recently solved the crystal structure of one ZBTB family member, PATZ1 (ZBTB19  
55 or MAZR) from mouse and zebrafish<sup>6</sup>. This work highlighted the similarity of the  
56 structures of known BTB domains. The structural similarity among the family members  
57 led us to question whether heterodimerization was possible.

58

59 To date, 14 BTB domain pairs in the ZBTB family were reported to form heterodimeric  
60 structures. These studies employ techniques that range from mass spectrophotometry  
61 to yeast two-hybrid screening (BioGRID database<sup>13</sup>). PATZ1, the focus of our studies,  
62 was originally identified in a two-hybrid screen with the BACH2 BTB domain used as  
63 a bait<sup>14</sup>. It is not clear that this or any other reported heterodimer has any biological  
64 function. One “forced” heterodimer X-ray structure indicates that MIZ1 and BCL6 can  
65 form stable heterodimers when expressed as a fusion protein<sup>15</sup>, but whether this  
66 interaction has a physiological significance is not clear. Moreover, for many reported  
67 interactions, it is not clear that the BTB domain is sufficient for heterodimer formation,  
68 leaving the possibility that additional C-terminal residues/domains might be necessary  
69 for mediating heterodimerization.

70

71 In the present study, we employ a fluorescent two-hybrid assay (F2H) in mammalian  
72 tissue culture cells to assess the homo vs. hetero dimerization of selected BTB  
73 domains, identifying only a single pair that can stably form heterodimers. Moreover,  
74 using ImmGen data<sup>16</sup>, we analyze positive and negative correlations among gene  
75 expression profiles of all ZBTB proteins in cells of the immune system. Finally, we  
76 employ molecular dynamics (MD) on a set of BTB homo and heterodimer structures  
77 to identify if formation of homodimers or heterodimers is energetically more favorable,  
78 and to determine the driving forces that contribute to dimer stability. While one BTB  
79 domain containing transcription factor, BACH2 contains a disulfide bond holding the  
80 obligate homodimer together in the crystal structure as well as in cell extracts<sup>17</sup>, our  
81 structural analysis indicates that mostly electrostatic interactions and hydrophobicity  
82 are responsible for dimer formation and stability. Among the BTB domains analyzed,  
83 only a single pair, PATZ1 and PATZ2 are co-expressed in many cell types, form

84 heterodimers and have favorable binding energies. Thus, a subset of target genes of  
85 these two transcription factors are likely regulated not by homodimers but rather  
86 heterodimers.

## 87 **Methods**

88

89 **BTB domain and GBP-LacI cloning.** The coding sequence of the BTB domain of  
90 selected ZBTB family proteins was amplified from cDNA derived from the human  
91 HCT116 cell line using Q5 High-Fidelity DNA Polymerase (NEB). Specifically for the  
92 Patz1 construct, the BTB domain was amplified from a murine Patz1 cDNA. Amplified  
93 fragments (Table S1) were cloned into the pcDNA 3.1/Myc-His(-)B- expression vector  
94 that contained either a TagGFP cDNA with a nuclear localization signal (NLS) or a  
95 TagRFP cDNA with no signal. BTB cDNAs were cloned into the XhoI and NotI  
96 restriction sites for TagGFP and between SmaI and NotI for TagRFP vectors, such  
97 that they encoded NLS-tagGFP-BTB or tagRFP-BTB proteins. The recombinant  
98 plasmid DNA was sequenced and transfected into Baby Hamster Kidney fibroblasts  
99 (BHK-1 cells) that were modified to contain concatemeric *E.coli* Lactose operator (Lac  
100 O) sequences inserted into a single locus (Chromotek, Germany).

101

102 For targeting the GFP fusion protein to the Lac O locus, we constructed a plasmid  
103 containing the Lac repressor sequence (Lac I) fused to a nanobody specific to GFP  
104 (GFP binding protein-GBP). This fusion gene was amplified and cloned into the pcDNA  
105 3.1/Myc-His(-)B- expression vector using NheI and BamHI digested amplicons  
106 generated from the F2H platform mixture as template with forward and reverse  
107 oligonucleotides (Table S1). This plasmid encodes a fusion protein that has a  
108 amino acid N-terminal GBP fused to 355 amino acid C-terminal Lac I domain  
109 separated by a 7 amino acid linker.

110

111 **Transfection, live-cell microscopy and F2H assay.** The Fluorescent Two-Hybrid  
112 (F2H) assay<sup>18-20</sup> was used to study dimer formation between pairs of BTB domains.  
113  $1.5 \times 10^5$  BHK-1 cells were seeded into 6-well plates with coverslip bottoms and  
114 transfected with polyethyleneimine (PEI) reagent at a ratio of 1:3 (DNA:PEI wt/wt).  
115 Equal mixtures of NLS-tagGFP-BTB or tagRFP-BTB and GBP-Lac I encoding  
116 plasmids were transiently co-transfected. 24 hours after transfection, adherent cells  
117 were visualized using an invert fluorescent microscope (ZEISS Axio Observer Z1) with  
118 10-20X magnification. Excitation was performed using either an HXP 120V fluorescent  
119 light source or a Colibri7 light source with LED470 or LED-Neutralwhite (540-580nm)  
120 and Filterset 38 (Excitation 470/40 BP; dichroic 495LP; emission 525/50 BP) or  
121 Filterset 43 (Excitation 545/25 BP; dichroic 570LP; emission 605/70 BP) for tagGFP  
122 and for tagRFP visualization respectively. Emission was detected either using a Zeiss  
123 Axiocam 503 mono or MRc5 camera.

124

125 In the F2H assay, GFP foci were only evident when the GBP-Lac I and tagGFP-BTB  
126 encoding plasmids were included in the transfection mixture. GFP-RFP colocalization  
127 was only evident when GBP-Lac I, tagGFP-BTB and tagRFP-BTB encoding plasmids  
128 were included in the transfection mixture. No foci were observed if the GBP-Lac I  
129 encoding plasmid was omitted from the transfection mixture. Because the F2H-BHK  
130 cells were not synchronized in their cell cycle, some cells were in S-phase and



131 contained two tagGFP foci, resulting from duplicated chromosomes. For these  
132 instances both foci were scored as independent events. Colocalization analysis was  
133 performed manually or by using the JACoP plugin of the Fiji software Version  
134 2.1.0/1.53c<sup>21-23</sup>.

135

136 **ImmGen cell type analysis of RNA co-expression.** The gene expression data of 46  
137 of the 49 ZBTB family genes were obtained from the Immunological Genome project  
138 (ImmGen) Microarray Phase 1 and Phase 2 datasets<sup>16</sup>. Probes for ZBTB21 (ZNF295),  
139 ZBTB35 (ZNF131) and ZBTB47 (ZNF651) were missing in the dataset and were not  
140 analyzed. The dataset contained gene expression data from primary murine cells from  
141 multiple immune lineages including B Lymphocytes, Monocytes, Mast, Basophil and  
142 Eosinophil (MBE), Stromal Cells, Innate Lymphocytes, Granulocytes, Macrophages,  
143 Dendritic Cells, Stem Cells and T Lymphocytes. Correlation coefficients of all pairs  
144 were calculated using least-squares linear regression and two-sided p-value was used  
145 for hypothesis testing.

146

147 **Conservation Analysis.** To retrieve homologs for each of the 6 BTB-domain proteins,  
148 a Blast<sup>24</sup> search was conducted locally against a non-redundant database  
149 (downloaded from Uniprot<sup>25</sup> -August 2019 release) including a canonical isoform for  
150 each protein. MAFFT<sup>26</sup> was used to build a multiple sequence alignment (MSA). We  
151 reconstructed a phylogenetic tree for each protein separately with FastTree<sup>27</sup>. We  
152 selected orthologous protein sequences from each tree, by traversing the phylogenetic  
153 tree starting from the query sequence until the node having the next human protein  
154 sequence as an eventual child. The previous node was selected as the monophyletic  
155 clade including the orthologous sequences only. Then, a new multiple sequence  
156 alignment and a new phylogenetic tree were build using the orthologs (Fig. S6). The  
157 MSA was constructed with 101 orthologous sequences for PATZ1, 118 for BCL6, 88  
158 for MIZ1, 76 for LRF, 152 for PATZ2 and 75 for ThPOK. ConSurf web server<sup>28</sup> was  
159 used with the final MSA and phylogenetic tree as inputs to calculate the conservation  
160 scores of the positions.

161

162 **Structure of heterodimers: docking and modelling.** The four BTB heterodimer  
163 structures presented in this work were obtained from available crystal structures or  
164 newly modelled structures built by homology and docked monomers of homodimer  
165 structures. Amongst the BTB heterodimers between ZBTB family members, the MIZ1-  
166 BCL6 construct is currently the only one for which the crystal structure has been  
167 deposited<sup>15</sup> (PDB entry 4U2M-chain B). The construct cloned to obtain this crystal  
168 structure is a forced heterodimer expressed as a fusion protein of BCL6 (WT) and  
169 MIZ1 BTB domain sequences connected by a linker peptide. The electron density from  
170 the linker peptide is not reported in the final structure, so the PDB coordinates were  
171 used in the simulation files preparation without further modifications. The PATZ1-  
172 BCL6 heterodimer structure was created using BCL6-BTB monomer (PDB entry  
173 1R29) and PATZ1-BTB monomer (PDB entry 6GUV). The three BCL6 residues  
174 mutated to aid the crystallization process (C8Q; C67R; C84N)<sup>7</sup> were back mutated to

175 WT using the Mutate Residue plugin of VMD<sup>29</sup>. Missing residues in the A2/B3 loop  
176 (75-105) of the PATZ1 structure were homology modelled as described previously<sup>6</sup>.  
177 The LRF-BTB structure (PDB entry 2NN2) was similarly modelled to fill the missing  
178 coordinates for A2/B3 residues 66-71 with ModLoop<sup>30</sup>. The PATZ2/ZBTB24-BTB  
179 domain (1-126) was homology modelled with the PRIMO suite<sup>31</sup> using BACH1,  
180 BACH2, MIZ1, BCL6 and PATZ1 structures as templates. Similarly, the ThPOK/  
181 cKrox/ZBTB15/ZBTB7b -BTB domain (1-144) was homology modelled using  
182 SWISSMODEL<sup>32</sup> using LRF/ZBTB7a as a template. All modelled heterodimer  
183 structures were generated with the PRISM docking server<sup>33</sup> by selecting the pose with  
184 the highest energy score.

185  
186 **Molecular Dynamics simulations.** Molecular dynamics (MD) simulations were  
187 performed in NAMD using the CHARMM36 force field parameters<sup>34,35</sup>. The simulation  
188 environment was prepared in VMD<sup>29</sup>. BTB dimer structures were centered in a solvent  
189 box padded with a 10 Å layer of water in every direction. The solvent was modelled  
190 using TIP3W water molecules, ionized with 0.15 M KCl. Periodic boundary conditions  
191 were applied in which long-range electrostatic interactions were treated using the  
192 particle mesh Ewald method<sup>36</sup> with a cutoff distance of 12 Å. The structural analysis  
193 by molecular simulation includes an initial run of minimization at constant temperature  
194 and constant volume (NVT). In the case of PATZ1-BCL6 and LRF-ThPOK  
195 heterodimers, the protein dimers were minimized for 30000 steps. A series of short  
196 runs (2 ns) with ramping temperature at 10 K intervals (from 280 to 310 K) was  
197 performed to reach the final running temperature of 310 K. All simulations were then  
198 performed at a constant temperature of 310 K in isothermal and isobaric conditions  
199 (NPT) after minimization, for a total of 500 ns.

200  
201 **Estimating free energy differences by MM-GBSA calculations.** Based on root  
202 mean square deviation (RMSD) calculations, we determined a time interval with the  
203 most stable conformation of each structure by calculating RMSD values over 500 ns.  
204 For each stable conformation, a coordinate file (pdb) and a trajectory file (dcd) were  
205 saved separately for monomers and for the complex (dimer) without solvent. The MD  
206 log file results obtained with NAMD were used to retrieve the energy components used  
207 in the Molecular Mechanics/Generalized Born Surface Area (MM-GBSA)  
208 calculations<sup>37</sup>. The free energy of dimerization ( $\Delta G$ ), neglecting the entropic  
209 contribution, is estimated by the equation:

$$210 \quad \Delta G = \Delta E_{int} + \Delta E_{ele} + \Delta G_{sol} + \Delta E_{vdw} \quad (1)$$

$$211 \quad \Delta G_{sol} = \Delta G_{sol}^{PB} + \Delta G_{sol}^{SA}$$

212  
213  
214  
215 where  $\Delta E_{int}$  represents the changes in intermolecular interactions calculated using the  
216 combined change in bond, angle, dihedral and improper energies.  $\Delta E_{ele}$  and  $\Delta E_{vdw}$   
217 represent the change in electrostatic and van der Waals energies, respectively.  $\Delta G_{sol}$

218 is the sum of the electrostatic solvation energy (polar contribution)  $\Delta G_{sol}^{PB}$  calculated via  
219 the Poisson-Boltzmann (PB) approximation, and the non-electrostatic solvation  
220 component (non-polar contribution),  $\Delta G_{sol}^{SA}$  that is related to the solvent accessibility  
221 (SA) of the residues. The Generalized Born implicit solvent (GBIS), based on the  
222 Poisson Boltzmann model, calculates the polar contribution while the non-polar energy  
223 is estimated by the solvent accessible surface area (SASA). Each energy component  
224 term was first extracted separately for the single monomers and for the dimer complex  
225 from the MD log files with the pynamd script<sup>38</sup>. To calculate each term in the final  
226 equation, the sum of the values of the individual monomers was subtracted from the  
227 value of the complex. For each frame, the sum of all finalized components was used  
228 to calculate the  $\Delta G$  of binding using equation (1). The average  $\Delta G$  of binding over the  
229 number of frames was corrected by the standard error. For example, the  $\Delta E_{vdW}$  term  
230 is:  $\Delta E_{vdW} = \langle \Delta E_{vdW}^{complex} \rangle - [\langle \Delta E_{vdW}^{monomer1} \rangle + \langle \Delta E_{vdW}^{monomer2} \rangle]$ .  
231

## 232 Results

233

234 **PATZ1-PATZ2 is a unique BTB domain heterodimer.** The BTB domain is found in  
235 about 1% (~200) of the proteins encoded in the human genome. The core secondary  
236 structures of the BTB domain are well conserved and their three-dimensional fold is  
237 strikingly similar (Fig. 1a). BTB domains are composed of around 120 amino acids, of  
238 which 35-40% make up the conserved dimer interface. The residues forming the  
239 interface are found in secondary structure elements forming  $\beta$  strands,  $\alpha$  helices and  
240 loops ( $\beta$ 1,  $\alpha$ 1,  $\alpha$ 1/B1 loop, A1, A2, A3, A3/ $\beta$ 2 loop,  $\beta$ 2 and A5 highlighted in Fig. 1c).  
241 The presence of  $\beta$ 1,  $\alpha$ 1 and  $\beta$ 2 is a specific feature of the BTB domain of ZBTB  
242 proteins defined by Stogios et al., 2005<sup>11</sup>. To quantify the structural similarity of BTB  
243 domains we calculated pairwise root mean square deviation (RMSD) values for eight  
244 select ZBTB proteins, whose structures were solved, or models were easily  
245 constructed (Fig. 1b). While primary sequence conservation is only evident in sub  
246 regions of the domain (Fig. 1c), structural similarity ranges between 1 and 2.5  
247 Angstroms (Fig. 1b).

248

249 In order to study the potential dimer formation *in vitro*, we setup a system to screen  
250 dimer formation of the eight aforementioned BTB domains in a pairwise fashion. We  
251 repurposed the commercially available F2H assay (Chromotek) (Fig. 2a). For this  
252 assay, each minimal BTB domain was expressed as an N-terminal fusion to either  
253 tagGFP or tagRFP fluorescent protein in the BHK-1 cell line engineered with the  
254 insertion of a large number of LacO sequences into a genomic locus. The fusion  
255 proteins were co-expressed with a fusion protein composed of the DNA binding  
256 domain of the LacI (lac repressor) protein fused to a GFP binding nanobody (GBP).  
257 BHK-1 cells transiently expressing these three fusion proteins were visualized under  
258 fluorescent microscopy. A GFP focus was detected where the Lac I anchored the BTB-  
259 tagGFP fusion protein captured by the tagGFP specific nanobody onto the locus  
260 containing the LacO sites. Association between the tagGFP and tagRFP tagged BTB  
261 domains also formed a co-localized red fluorescent focus indicating dimer formation.  
262 Microscopic images of the F2H assay conducted with all sixty-four BTB pairs were  
263 used to generate a matrix of homo and heterodimers (Fig. 2b). Of the pairs of BTB  
264 domains analyzed, we found that all could form homodimers (shown on the diagonal  
265 of the matrix and in Fig. 2d-e), but only the PATZ1-PATZ2 pair formed a heterodimer  
266 in this assay (Fig. 2c).

267

268 To identify possible restrictions on heterodimer formation, we investigated the  
269 expression profiles of all ZBTB proteins in various cell types of the immune system  
270 using ImmGen data<sup>16</sup>. We particularly focused on four candidate pairs of ZBTB  
271 proteins (PATZ1-PATZ2, BCL6-PATZ1, MIZ1-BCL6 and LRF-ThPOK), which were  
272 previously reported to form heterodimers<sup>15, 39-41</sup>.

273 While the expression of these ZBTB genes were positively correlated in many immune  
274 system cell types, Patz1-Bcl6 expression was negatively correlated in dendritic, mast,

275 basophil and eosinophil cells (Table 1 and Fig. S1). The negative correlation between  
276 Lrf-ThPOK expression in pooled T lymphocyte data is not evident when individual  
277 subpopulations are evaluated<sup>16</sup>. In this analysis, while positive correlation does not  
278 imply physical association between ZBTB proteins, it provides evidence that the  
279 physical association between PATZ1 and PATZ2 demonstrated in the F2H assay is  
280 not restricted by expression in most immune cell types (Fig. S2).

281

282 **Structurally conserved BTB domains use diverse mechanisms to stabilize**  
283 **homodimers.** To better understand the potential of BTB domain heterodimerization,  
284 we assessed structural features that contribute to dimer stability. The interaction  
285 surface for dimerization in the ZBTB family is mostly hydrophobic and involves the N  
286 and C termini of the two monomers and the central  $\alpha$ -helices and loops. This  
287 dimerization interface contains a central charged pocket that consists of two charged  
288 residues (an absolutely conserved negatively charged aspartate (D), located at the  
289 beginning of B1, and a positively charged lysine (K) or arginine (R) at the beginning of  
290 A1, which form inter- or intra-chain ionic bonds<sup>42</sup>. We analyzed either crystal structures  
291 or models of five homodimers and four putative heterodimers by MD simulations to  
292 identify the relevance of these features.

293

294 For each dimer pair, we ran MD simulations of 500 ns. Our analysis of the interface  
295 interactions focused on the lifetime of salt bridges (plotted as barcode graphs), that  
296 have a strong contribution in the electrostatic component of the total  $\Delta G$  of binding for  
297 homodimers (Fig. 3) and putative heterodimers (Fig. 4). Of the homodimers analyzed,  
298 we find that the PATZ1-PATZ1 pair has the highest number of interchain charged  
299 interactions (Fig. 3a). The salt bridge formed between R39 and D42 (which is in the  
300 BTB domain charged pocket) was originally observed in the crystal structure of PATZ1  
301 (PDB entry 6GUV) but was replaced by the R39-D76 interaction upon the construction  
302 of the missing loop model. The extended MD simulation recovers the R39-D42 salt  
303 bridge. Unlike the PATZ1 homodimer, which contains dynamic salt bridges, the  
304 homodimers of BCL6, MIZ1, LRF, PATZ2 (Fig. 3b-e) have stable salt bridges forming  
305 their conserved charged pockets. Curiously, the residues of the charged pocket of  
306 BCL6 (Fig. 3b) form intrachain electrostatic interactions rather than interchain bonds  
307 in the crystal structure (PDB entry 1R29) and continue to do so over the course of the  
308 simulation.

309

310 As evolutionary conservation is correlated with structural or functional roles of amino  
311 acids, we assessed the conservation score for every residue of the BTB domain.  
312 These scores are color coded (scored from 1 to 9) in the tertiary structure of the  
313 respective BTB domains (Fig. S3) and are annotated in Fig. 3. We find that PATZ1  
314 R39 and D42 are absolutely conserved oppositely charged residues. As the PATZ1  
315 A2/B3 loop is a feature only observed in mammals, this region, including D76 shows  
316 low conservation (Fig. S3 and Piepoli et al., 2020<sup>6</sup>).

317



318 We surmised that the choice between homo and heterodimer formation may be driven  
319 by the relative stability of each alternative pair. To understand the thermodynamic  
320 basis of dimerization, we calculated an estimate of the total  $\Delta G$  of binding by summing  
321 the free energy of  $\Delta E_{\text{int}}$ ,  $\Delta E_{\text{ele}}$ ,  $\Delta G_{\text{sol}}$  and  $\Delta E_{\text{vdW}}$ , based on MM-GBSA calculations  
322 derived from MD trajectories of homodimers (Table 2). Calculations were restricted to  
323 the equilibrated portions of the trajectory, as shown by the boxed portions of the RMSD  
324 plots in Fig. 3. As expected from the stable homodimeric structure of BTB domains,  
325 the energy features contributing to the dimerization interface for all dimers resulted in  
326 energetically favorable interactions with negative  $\Delta G$  values. We find that although the  
327 stabilization energy per residue varied in the interval [-2.1, -1.6] kcal/mol, the factors  
328 contributing to this energy were from different sources for each pair of homodimers.  
329 For the intramolecular interactions in the molecules making up the dimer, for all  
330 systems analyzed the bond stretching/bending/torsions ( $\Delta E_{\text{int}}$ ) which make up the local  
331 terms were all negative indicating that local strains were relieved upon dimerization,  
332 more so in some systems (e.g., LRF homodimer) than in others (e.g., BCL6 or MIZ1  
333 homodimer). In terms of nonbonded interactions, we found that the PATZ1 homodimer  
334 is overwhelmingly stabilized by the large favorable electrostatic interactions ( $\Delta E_{\text{ele}}$ ),  
335 especially those established at the interface as is also corroborated by the salt bridges  
336 formed (Fig. 3a).

337  
338 MM-GBSA calculations show that the PATZ1 BTB domain is the most favorable  
339 homodimer with binding free energy ( $\Delta G$ ) equal to -529.1 kcal/mol for the equilibrated  
340 conformation, averaged between two duplicate MD runs (Table 2). BCL6 BTB  
341 homodimer is a less favorable construct than that of PATZ1 having 0.2 kcal/mol higher  
342 binding free energy per amino acid (-1.8 vs -1.6 kcal/mol). In this homodimer, the  
343 energy component deriving from local constraints in bonds, angles, and dihedrals  
344 ( $\Delta E_{\text{int}}$ ) is the least favorable. Due to low variation in the RMSD (Fig. 3b), for BCL6 all  
345 trajectory was considered for MM-GBSA calculations. In the case of the MIZ1 BTB  
346 homodimer, we considered the equilibrated conformation between 100 and 500 ns  
347 (Fig. 3c and Table 2). The binding free energy is favorable and equal to -384.1  
348 kcal/mol, yet along with the previous BCL6 case, is the least favorable among the  
349 other dimers analyzed in this study (-1.6 kcal/mol/AA).

350  
351 Despite the similar binding energies, the factors contributing to the overall energy are  
352 different. The energy components contributing favorably to a loss of electrostatics are  
353 the van der Waals energy ( $\Delta E_{\text{vdW}}$ ) and the solvation free energy deriving from the non-  
354 polar contribution ( $\Delta G_{\text{sol}}^{\text{SA}}$ ) making a weak dimer interface for MIZ1 BTB protein. In  
355 comparison, the binding free energy for LRF homodimer is the most favorable (-2.1  
356 kcal/mol/AA). Unlike in PATZ1 homodimer, this strength draws not from an abundance  
357 of electrostatic interactions at the interface, but rather is due to the local release of  
358 strains in bond stretching, bending and torsional angles.

359  
360 Apart from the formation of salt bridges and energetic contributions, another factor  
361 influencing the choice between homo and heterodimer may be the surface area of a



362 monomer buried by dimerization. Thus, we extracted the solvent accessible surface  
363 area (SASA) of the dimers and of the forming monomers and calculated the resultant  
364 buried surface area (BSA) from the trajectories of the five BTB homodimers (Fig. S4  
365 and Table 2). We find that PATZ1 and PATZ2 have the largest BSA, correlating with  
366 the largest calculated free energy change of homodimerization (Table 2). The  
367 variability of the BSA values over the course of the simulation shows the stability of all  
368 the interchain contacts, including ionic, polar and non-polar interactions. We therefore  
369 conclude that while the overall folds of the BTB domains are well conserved as  
370 implicated by the low RMSD values (Fig. 1b), energetically, dimerization is not  
371 facilitated by a single mechanism. In fact, it is predominantly the extensive salt bridge  
372 formation in PATZ1, release of local strains in LRF, the relatively low energy cost of  
373 electrostatic solvation for MIZ1, and hydrophobicity for PATZ2. For BCL6, it is a  
374 combination and compensation of all these factors that achieve the final homodimer.

375

376 **Heterodimerization results from additional interactions.** To determine the relative  
377 stability of heterodimers, compared to homodimers, we constructed models of four  
378 putative BTB heterodimers originating from monomer structures and ran MD  
379 simulations, performed MM-GBSA calculations and identified the BSA values. As  
380 before, for each heterodimer pair, MD simulations (500 ns) yielded information about  
381 interface interactions based on the lifetime of salt bridges (Fig. 4).

382

383 While the PATZ1 interface has the largest number of salt bridges amongst the  
384 homodimers, the PATZ1-PATZ2 and BCL6-PATZ1 heterodimer interfaces established  
385 additional salt bridges (Fig. 4a-b). The PATZ1-PATZ2 dimer interface has a significant  
386 interaction between residues E60b and R39a, both well conserved residues, which is  
387 present for 60% of the trajectory. A second salt bridge formed between D38b and  
388 R56a, also a well conserved pair, is present for over 58% of the trajectory.  
389 Interestingly, while all other PATZ1 residues involved in the salt bridges between  
390 PATZ1-PATZ2 heterodimers also make similar interactions in the PATZ1 homodimer,  
391 PATZ1 residue R56 only makes salt bridges with PATZ2 (reconstituting an interchain  
392 charged pocket interaction). We find that in general the residues forming the charged  
393 pocket in the heterodimer models form interchain salt bridges, with the exception of  
394 the BCL6-PATZ1 pair, which retains stable intrachain salt bridges.

395

396 BTB domain N-terminal interactions have recently been proposed to mediate dimer  
397 stability<sup>43</sup>. N-terminal  $\beta$ -strand spontaneous complex dissociation could thus  
398 differentiate homodimers from heterodimers. While we observe the presence of stable  
399 N-terminal  $\beta$ -strand interactions in many of the homodimer structures, this feature is  
400 present only in the PATZ1-PATZ2 heterodimer model (Fig. 4a). Noticeably, the two  
401 symmetrical  $\beta$ -sheets formed at the dimerization interface between  $\beta$ 1 and  $\beta$ 2 of the  
402 two monomers are stable throughout the PATZ1-PATZ2 simulation, and do not show  
403 any sign of spontaneous unfolding. In contrast, in the BCL6-PATZ1 BTB heterodimer

404 (Fig. 4b) the N-terminal  $\beta$ 1 strand of BCL6 (chain a) disengages from the  $\beta$ -sheet with  
405  $\beta$ 2 of PATZ1, leading to a partial unfolding of the dimer interface.

406

407 Also the MIZ1-BCL6 heterodimer has an unstable interface because, while the BCL6  
408 homodimer interface relies on a sheet formed by the interaction of  $\beta$ 1 and  $\beta$ 2, MIZ1  
409 lacks a complete  $\beta$ 1-strand (Fig. 4c). MD trajectories reveal the accommodation of a  
410 new stable conformation for the short N-terminus of MIZ1 that swings from the initial  
411 docked position parallel to  $\beta$ 2 in BCL6 to a new interaction with the N-terminal of BCL6.  
412 Explicitly, we can follow this conformational change by tracking the salt bridges formed  
413 by D2a initially interacting with R94b and then settling for R13b. Significantly, the  
414 spontaneous unfolding of one of the primary dimer interface  $\beta$ -sheets, may represent  
415 a target for dimer quality control mechanisms<sup>43</sup>. As for the MIZ1-BCL6 heterodimer,  
416 besides this local flexibility, the ionic interaction between the highly conserved charged  
417 pocket residues (D33b-K39a) is preserved and remains important in the trajectory of  
418 all dimers (Fig. 4c). Similarly, we can see the highly conserved charged pocket  
419 residues D35 and R49 of LRF-ThPOK BTB heterodimer (Fig. 4d) forming two strong  
420 symmetric salt bridges both present for at least 70% of the whole trajectory.

421

422 The A2/B3 loop of PATZ1 contributes to the large BSA of the PATZ1-PATZ2 and  
423 BCL6-PATZ1 heterodimers, which have an average area of 2348 and 2054  $\text{\AA}^2$ ,  
424 respectively (Fig. S5). Unlike the first two cases, the MIZ1-BCL6 BTB heterodimer  
425 interface area is small, equal on average to 1548  $\text{\AA}^2$  with the lowest percentage of the  
426 total residue count involved in the interface (Table 3). This is due to an asymmetric  
427 dimer interface between the two monomers. The fluctuations in the RMSD (Fig. 4c)  
428 reflect the adjustments related to the shorter  $\beta$ 1 sequence of MIZ1-BTB.

429

430 As for the homodimers, all heterodimers show favorable interaction energy (Table 3).  
431 PATZ1-PATZ2 is the strongest heterodimer among the ones analyzed with binding  
432 free energy ( $\Delta G$ ) equal to -529.5 kcal/mol. BCL6-PATZ1 heterodimer is also a  
433 favorable construct with binding free energy equal to -470.9 kcal/mol. MIZ1-BCL6  
434 heterodimer is the least favorable of the heterodimers considered in this study with  
435 binding free energy equal to -1.6 kcal/mol/AA. LRF-ThPOK heterodimer is a favorable  
436 construct with binding free energy of -1.8 kcal/mol/AA on the order similar to that of  
437 the PATZ1 homodimer. At the outset, a heterodimer is expected to form if the energy  
438 gain is lower than that expected from its homodimers. For example, for the PATZ1-  
439 PATZ2 heterodimer, an expected energy is the average from their homodimers, i.e.,  
440 ca. -507 kcal/mol. Similarly, the BCL6-PATZ1 average energy is -465 kcal/mol and the  
441 MIZ1-BCL6 interaction is -393 kcal/mol. We find that, the  $\Delta G$  for the PATZ1-PATZ2  
442 heterodimer is -529.5 kcal/mol, i.e., it is  $\sim$ 22 kcal/mol lower than the average energy  
443 expected from the homodimers (Table 3). This is in contrast with the observations for  
444 BCL6-PATZ1 and MIZ1-BCL6 heterodimers whereby the expected and measured  $\Delta G$   
445 values are within  $\sim$ 5-6 kcal/mol of each other; i.e., there is no substantial need to prefer

446 heterodimers over homodimers for these pairs. A closer inspection of the various  
447 contributors to the final energies puts homo- vs. heterodimerization into perspective.  
448

## 449 Discussion

450

451 This study documents that BTB domains can heterodimerize. We evaluated the  
452 dimerization potential of 64 pairs of BTB domains and find that while all pairs can  
453 generate homodimers, only one, PATZ1 (ZBTB19) and PATZ2 (ZBTB24) can form  
454 heterodimers *in vivo*. Energetic calculations confirmed that this heterodimer could form  
455 a favorable interaction interface, predominantly due to additional stable salt bridges.  
456 Despite the similar name, PATZ1 and PATZ2 only show 26.5% identity and 42.4%  
457 similarity in their BTB domain sequence. These two ZBTB family members are  
458 structurally related, being the only proteins in the ZBTB family that have an additional  
459 AT-hook motif (binding the minor groove of Adenine-Thymine rich DNA), that is  
460 thought to confer an alternative DNA binding specificity to these proteins. In our assays  
461 we used the minimal BTB domain consisting of 157 amino acids for PATZ1 and 133  
462 for PATZ2, lacking the AT-hook motif. This demonstrates that the AT-hook is not  
463 necessary for heterodimer formation and that BTB domains are sufficient to form  
464 heterodimeric structures. These findings reveal that the PATZ1-PATZ2 heterodimer is  
465 as stable as the PATZ1 or PATZ2 homodimers in the cellular environment, a finding  
466 that is supported by the calculated binding free energy of these complexes.  
467 Electrostatic interactions in proteins are fine-tuned by the various niches in the cellular  
468 environment, with differences of pH or ionic strength<sup>44</sup>. The dominance of the  
469 electrostatic component in the PATZ1-PATZ2 heterodimer might confer its ubiquity in  
470 the different cell types where they are co-expressed (Table 1).

471

472 The demonstration of definitive heterodimer formation between PATZ1 and PATZ2  
473 now will allow the questioning of the participation of each protein in the phenotypes  
474 observed in the mutation or knockout of the other factor. For example, mutations in  
475 the *Zbtb24* gene result in the methylation defects observed in the immunodeficiency,  
476 centromeric instability and facial defect syndrome type 2 (ICF2)<sup>45-47</sup>. Does PATZ1  
477 participate in this defect? How many of the previously identified 187 differentially  
478 expressed genes (DEG) in *Patz1*<sup>-/-</sup> cells<sup>48</sup> are controlled by PATZ1 in collaboration  
479 with PATZ2 is an open question.

480

481 We investigated the underlying structural factors behind BTB domain dimerization to  
482 understand the basis of homo vs. heterodimer choice. A functional consequence of  
483 homodimer formation in various ZBTB proteins is the formation of a lateral groove that  
484 is a docking site for co-repressor proteins<sup>49</sup>. While other BTB domains have been  
485 shown to interact with co-repressors, the only available co-crystal structure is that of  
486 BCL6 and its co-repressors<sup>7, 50-52</sup>. In these structures, the co-repressor peptides  
487 associate with the BTB homodimer as symmetrical pairs themselves. The interaction  
488 of BCL6 homodimers with co-repressor peptides has been studied in detail using  
489 molecular dynamics supported by MM-GBSA calculations, revealing potential sites  
490 that can be targeted by drugs<sup>53</sup>. With the definitive demonstration of the presence of  
491 heterodimers, we open the question of whether heterodimers can also form the landing  
492 pad structures for these co-repressors. If so, could the non-symmetrical lateral

493 grooves of BTB heterodimers provide a mechanism of altered specificity for co-  
494 repressors? Besides the BTB domain lateral groove interactions assisted by lower  $\beta$ -  
495 sheet extensions, exemplified by the BCOR/NCOR1/NCOR2 interactions with BCL6,  
496 a novel interaction site on BTB domains was recently revealed<sup>54</sup>. The interaction of a  
497  $\beta$ -strand containing peptide from HUWE1 with the flexible B3 region of MIZ1 can result  
498 in an upper  $\beta$ -sheet extension. Whether these interactions can form in other BTB pairs  
499 is not known. An obvious candidate for such an interaction would be the flexible top  
500 region containing BTB domains such as PATZ1 and PATZ1 containing (heterodimeric)  
501 complexes.

502  
503 Formation of BTB heterodimers would dramatically increase the combinatorial target  
504 specificity of this transcription factor family. Obviously, such heterodimer formation  
505 would be restricted by the tissue and stage specific expression of the individual  
506 proteins. Mechanistic constraints in the synthesis of these proteins, such as the  
507 recently reported co-translational dimerization pathways<sup>55</sup>, may impart restrictions on  
508 the formation of heterodimers, possibly favoring the formation of homodimers co-  
509 translated on polysomes. However, the combinatorial specificity may not be regulated  
510 only at the level of the formation of homo- or heterodimers, but in the cellular half-life  
511 of these alternative protein structures. A recent study proposed the presence of  
512 evolutionarily conserved degron residues which preferentially targets BTB  
513 heterodimers for degradation<sup>56</sup>. Although this study examined the degradation  
514 properties of non-transcription factor BTB domain containing proteins, degron  
515 structures may likely be conserved in ZBTB proteins as well, making unwanted BTB  
516 heterodimers prone to degradation. Furthermore, according to the BTB quality control  
517 hypothesis<sup>43</sup>, heterodimers can be targeted for degradation based on the identity of  
518 the N-terminal  $\beta$ 1 sequence that forms a critical interface surface. In fact, we identified  
519 an N-terminal sequence in the PATZ1 crystal structure that preferentially stabilizes  
520 homodimeric structures<sup>6</sup>. The propensity of this region to result in aggregation that  
521 potentially targets BTB domains for degradation has also been observed in the BCL6  
522 protein crystal structure, which can be used as a means for co-crystallization<sup>50</sup>.

523  
524 The F2H assay we introduce in this study is built on a previous iteration that tested the  
525 interaction between the minimal interaction domains of the p53 and MDM2/MDM4  
526 proteins<sup>19</sup>. This system can be used as a high-throughput screening tool to test for  
527 drugs that block interaction<sup>57</sup>. In its current version, this assay can be used to not only  
528 discover new heterodimers and their third-party interactors, but also inhibitors of  
529 dimers. As BTB domains form obligate homodimers, it is surprising that heterodimers  
530 can in fact be observed in this assay. Because the system is set up with one monomer  
531 (tagGFP partner) with a nuclear localization signal (NLS) and a second monomer  
532 (tagRFP partner) without any such signal, we find that the interaction between BTB  
533 monomers is strong enough to recruit BTB domains with no NLS into the nucleus.  
534 Significantly, the PATZ1-PATZ2 interaction that scores positive with a GFP-RFP pair

535 also does so with an RFP-GFP pair, indicating the robustness of the system to  
536 recapitulate *in vivo* interactions (Fig. 2).

537

538 In this study, we determined the driving forces that contribute to dimer stability. We  
539 find by MD simulations that all heterodimers are favorable. Different mechanisms  
540 contribute to homo and heterodimer stability. Significantly, homo and heterodimer  
541 interfaces are typically characterized by numerous and sometimes short-lived  
542 electrostatic interactions. Thus, evolution has favored conserving the fold which  
543 serves as a template for catering to the overall functions attributed to these systems  
544 while diverse mechanisms have been utilized to compensate for the variations  
545 observed in family members (siblings) introduced to enable those functions. The  
546 analysis of the energy components contributing to dimerization also paves the way to  
547 design stable BTB heterodimers particularly by engineering interface residues and  
548 limiting accessibility to degron positions. Our analysis confirms that heterodimerization  
549 among ZBTB family members is infrequent and that homodimers are preferred.  
550 Nevertheless, the absence of energetic restrictions for BTB domain-mediated  
551 heterodimers suggest that more pairs of heterodimers could possibly form, increasing  
552 transcription factor combinatorial specificity.

553



## 554 Figure Captions

555

556 **Figure 1.** Structural conservation in the BTB domain. A cartoon representation of the  
557 BTB domain **(a)**, with annotated secondary structural elements between N- and C-  
558 termini, is colored based on a metric for structural alignment (Q-score) ranging from  
559 blue to red to show the most and the least conserved regions, respectively. The nine  
560 overlapped structures belong to the BTB monomers of BCL6, KAISO, PLZF, ThPOK,  
561 LRF, PATZ1, PATZ2, MIZ1 and 90K human proteins. The structural alignment is  
562 measured in terms of RMSD (Å) of the  $C_{\alpha}$  atoms for each pair of BTB domain  
563 structures **(b)**. The RMSD among this set of BTB structures is under 2 Å except for  
564 the two cases of PATZ1-PATZ2 and PATZ1-MIZ1. The secondary structure labeling  
565 follows the convention for the BTB fold as used in Stogios et al., 2005<sup>11</sup>. The structure  
566 and sequence of the human BTB-containing protein 90K (PDB entry 6GFB)<sup>58</sup> is only  
567 used here as a divergent example to underline the similarity of the BTB domain in  
568 ZBTB proteins. In the corresponding sequence alignment **(c)**, the residues forming the  
569 BTB homodimer interface are highlighted. The residues in the BTB characteristic  
570 charged pocket are indicated with a box. The three absolutely conserved positions are  
571 indicated with an asterisk (\*). The secondary structures are annotated on the  
572 sequences for orientation with part **(a)**. The unlabeled  $\beta$ -strand between A2 and B3  
573 indicates an additional secondary structure revealed in the model of PATZ1<sup>6</sup>.

574

575 **Figure 2.** F2H assay is readapted for the screening of the BTB homo and heterodimer  
576 formation *in vitro*. Schematic description of the experimental setup **(a)**. The co-  
577 transfected plasmids of the recombinant sequences of BTB domains tagged with  
578 green or red fluorescent proteins (GFP or RFP) and the GFP-binding nanobody (GBP)  
579 fused to Lac I sequence are represented as white circles before the corresponding  
580 outline of the expressed fused proteins. Below, the nuclear interaction site on the DNA  
581 of BHK-1 cells, scaffolds the co-localization experiment. In matrix representation **(b)**,  
582 the summary of the different dimer combinations tested. For each experimental pair,  
583 the colocalization signal is either not detected (ND) or detected in the reported  
584 percentage of the total number of cells analyzed. The only heterodimer identified with  
585 this assay is between PATZ1 and PATZ2 BTB domains. **(c)** Two examples of the cells  
586 in which co-localization of the fluorescent signals from GFP-tagged PATZ1 and RFP-  
587 tagged PATZ2 BTB domains was detected. Different microscope filters detect the two  
588 different signals captured in separate images, later overlapped for the merged section.  
589 **(d)** Representative fluorescent microscopy images of colocalized tagGFP or tagRFP  
590 fusion BTB domains. Only the positive scored interactions from part **(a)** are shown.  
591 Three channel images displayed GFP (top row), RFP (middle row) fluorescence and  
592 brightfield (bottom row). **(e)** Quantification of the colocalization assay. The bar graph  
593 shows the percentage of GFP focus positive cells that also displayed an RFP focus  
594 (positive) or not (negative). Numbers inside the bar graphs indicate the total number  
595 of cells analyzed for each case. Colors refer to part **(a)** where each column displays  
596 data from cells transfected with GFP and RFP tagged versions of the indicated BTB

597 domains. The only heterodimers that interact were GFP tagged PATZ1-BTB (GP1)  
598 with RFP tagged PATZ2-BTB (RP2) and GFP tagged PATZ2-BTB (GP2) with RFP  
599 tagged PATZ1-BTB (RP1).

600

601 **Figure 3.** MD simulation analyses for the BTB domain homodimers. RMSD plots, salt  
602 bridge formation barcodes, and a cartoon representation of the BTB domain dimer  
603 structure are shown for, PATZ1 **(a)**, BCL6 **(b)**, MIZ1 **(c)**, LRF **(d)** and PATZ2 **(e)**. The  
604 RMSD plot shows the structural distance (Å) of the protein atoms coordinates ( $C_{\alpha}$ ) as  
605 a function of time (ns) and contains the snapshots of the significant conformational  
606 changes of the dimer structure. Every salt bridge between a pair of charged amino  
607 acids with a distance within the 3.0 Å cut-off, is represented with a bar in the barcode  
608 plot and reported if present over the 8% of the total simulation time. The amino acids  
609 belonging to one monomer (a) or the other (b) involved in the interchain interactions  
610 are labelled with one-letter-code. For each residue in these interchain salt bridges, the  
611 conservation score is displayed next to its label in the range [1,9] increasing from  
612 variable (1) to conserved (9) as calculated via the ConSurf webserver.

613

614 **Figure 4.** MD simulation analyses for the BTB domain heterodimers. RMSD plots, salt  
615 bridge formation barcodes, and a cartoon representation of the BTB domain dimer  
616 structure are shown for PATZ1-PATZ2 **(a)**, BCL6-PATZ1 **(b)**, MIZ1-BCL6 **(c)** and LRF-  
617 ThPOK **(d)**. See caption to Fig. 3 for details.

618

619 **Tables**

620

621 **Table 1.** Expression correlation of four pairs of ZBTB genes\*

622

|             | B Cells      | T Cells       | Monocytes | Stem Cells   | Stromal Cells | Innate Lymphocytes | Macrophages  | Dendritic Cells | MBE           | Granulocytes |
|-------------|--------------|---------------|-----------|--------------|---------------|--------------------|--------------|-----------------|---------------|--------------|
| PATZ1-PATZ2 | <b>0.433</b> | <b>0.229</b>  | 0.099     | <b>0.354</b> | <b>0.627</b>  | 0.245              | <b>0.446</b> | <b>0.331</b>    | <b>0.507</b>  | <b>0.581</b> |
| PATZ1-BCL6  | 0.077        | <b>0.248</b>  | -0.086    | -0.024       | <b>0.683</b>  | 0.157              | 0.097        | <b>-0.361</b>   | <b>-0.573</b> | <b>0.637</b> |
| BCL6-MIZ1   | -0.194       | <b>0.356</b>  | -0.122    | 0.176        | 0.197         | <b>0.603</b>       | <b>0.336</b> | 0.046           | -0.026        | <b>0.598</b> |
| LRF-ThPOK   | <b>0.675</b> | <b>-0.185</b> | 0.036     | 0.334        | <b>0.370</b>  | <b>0.455</b>       | 0.132        | -0.080          | <b>0.479</b>  | <b>0.499</b> |

623

624 \*R-values with  $p$ -value  $\leq 0.05$  (significant) are shown in bold. The grouped Mast, Basophil and Eosinophil is shortened as "MBE".  
625 Additional information on these values is in Fig. S1.

626

627 **Table 2.** Binding energies for BTB homodimers and individual contributions to the total  
628 energy\*

| Homodimers        | MM-GBSA                            |                                    |                                    | $\Delta G_{sol}$                  |                                   |                                    | #AA dimer | $\Delta G/AA$ | avg BSA ( $\text{\AA}^2$ ) | AA in interface (%) |
|-------------------|------------------------------------|------------------------------------|------------------------------------|-----------------------------------|-----------------------------------|------------------------------------|-----------|---------------|----------------------------|---------------------|
|                   | $\Delta G$ binding kcal/mol        | $\Delta E_{int}$                   | $\Delta E_{ele}$                   | $\Delta G_{sol}^{PB}$             | $\Delta G_{sol}^{SA}$             | $\Delta E_{vdw}$                   |           |               |                            |                     |
| PATZ1 (300-500ns) | <b>-529.1 <math>\pm</math> 0.7</b> | -353.9 $\pm$ 0.4                   | <b>-418.0 <math>\pm</math> 3.5</b> | 437.1 $\pm$ 3.2                   | 0 $\pm$ 0.1                       | -194.3 $\pm$ 0.5                   | 290       | -1.8          | 1864 $\pm$ 14              | 40.7                |
| BCL6 (1-500ns)    | -401.6 $\pm$ 0.2                   | -237.5 $\pm$ 0.1                   | -278.7 $\pm$ 0.9                   | 330.6 $\pm$ 0.8                   | -25.4 $\pm$ 0.1                   | -190.5 $\pm$ 0.1                   | 250       | -1.6          | 1899 $\pm$ 6               | 34.8                |
| MIZ1 (100-500ns)  | -384.1 $\pm$ 0.2                   | -282.8 $\pm$ 0.1                   | -170.0 $\pm$ 1.0                   | <b>235.9 <math>\pm</math> 1.0</b> | -18.8 $\pm$ 0.1                   | -148.4 $\pm$ 0.2                   | 234       | -1.6          | 1471 $\pm$ 4               | 37.2                |
| LRF (280-500ns)   | -520.3 $\pm$ 0.3                   | <b>-380.0 <math>\pm</math> 0.2</b> | -322.8 $\pm$ 1.5                   | 399.6 $\pm$ 1.4                   | -22.3 $\pm$ 0.1                   | -194.7 $\pm$ 0.2                   | 244       | <b>-2.1</b>   | 1752 $\pm$ 4               | 36.9                |
| PATZ2 (100-500ns) | -485.4 $\pm$ 0.7                   | -335.5 $\pm$ 0.3                   | -247.8 $\pm$ 3.9                   | 254.5 $\pm$ 3.8                   | <b>-43.3 <math>\pm</math> 0.1</b> | <b>-200.0 <math>\pm</math> 0.6</b> | 258       | -1.9          | 2037 $\pm$ 6               | 38.0                |

629

630 \*Calculations are carried out for the equilibrated portion of the trajectory indicated in parenthesis and shown in Fig. 3. Most favorable  
631 energy values indicated in bold.

632

633 **Table 3.** Binding energies for BTB heterodimers and individual contributions to the  
634 total energy\*

| Heterodimers            | MM-GBSA                                |                                    |                                    |                                    | $\Delta G_{sol}$                  |                                   |                                    | #AA dimer | $\Delta G/AA$ | avg BSA ( $\text{\AA}^2$ ) | AA in interface (%) |
|-------------------------|----------------------------------------|------------------------------------|------------------------------------|------------------------------------|-----------------------------------|-----------------------------------|------------------------------------|-----------|---------------|----------------------------|---------------------|
|                         | $\Delta G$ binding kcal/mol (Expected) | $\Delta G$ binding kcal/mol        | $\Delta E_{int}$                   | $\Delta E_{ele}$                   | $\Delta G_{sol}^{PB}$             | $\Delta G_{sol}^{SA}$             | $\Delta E_{vdw}$                   |           |               |                            |                     |
| PATZ1-PATZ2 (350-500ns) | -507.3 $\pm$ 1.4                       | <b>-529.5 <math>\pm</math> 0.4</b> | -340.0 $\pm$ 0.2                   | <b>-471.0 <math>\pm</math> 2.8</b> | 535.4 $\pm$ 2.7                   | <b>-30.4 <math>\pm</math> 0.1</b> | <b>-223.4 <math>\pm</math> 0.3</b> | 274       | <b>-1.9</b>   | 2348 $\pm$ 5               | 40.1                |
| BCL6-PATZ1 (60-500ns)   | -465.4 $\pm$ 0.9                       | -470.9 $\pm$ 0.2                   | -306.6 $\pm$ 0.1                   | -461.6 $\pm$ 1.8                   | 531.0 $\pm$ 1.7                   | -27.3 $\pm$ 0.1                   | -206.4 $\pm$ 0.2                   | 270       | -1.7          | 2054 $\pm$ 6               | 37.8                |
| MIZ1-BCL6 (180-500ns)   | -392.9 $\pm$ 0.4                       | -397.6 $\pm$ 0.2                   | -272.3 $\pm$ 0.1                   | -152.8 $\pm$ 0.8                   | <b>202.7 <math>\pm</math> 0.7</b> | -19.6 $\pm$ 0.1                   | -155.7 $\pm$ 0.2                   | 242       | -1.6          | 1548 $\pm$ 4               | 33.1                |
| LRF-ThPOK (350-500ns)   |                                        | -471.3 $\pm$ 0.3                   | <b>-348.6 <math>\pm</math> 0.2</b> | -249.3 $\pm$ 1.5                   | 316.4 $\pm$ 1.4                   | -21.0 $\pm$ 0.1                   | -168.8 $\pm$ 0.2                   | 259       | -1.8          | 1706 $\pm$ 4               | 34.7                |

635

636 \*Calculations are carried out for the equilibrated portion of the trajectory indicated in parenthesis and shown in Fig. 4. Most favorable  
637 energy values indicated in bold.

638

## 639 Supplementary Material

640

641 **Figure S1.** Statistical significance for values in Table 1. The R-value indicates positive  
642 (blue) or negative (red) correlation in the expression profiles of the genes pair. The  
643 statistical significance of the R-value is determined by a p-value < 0.05 that is  
644 otherwise highlighted in grey. The -log<sub>10</sub> of the p-value gives a measure in integer  
645 numbers of the p-value significance with a higher number indicating higher  
646 significance.

647

648 **Figure S2.** Co-expression patterns of ZBTB proteins based on linear least-squares  
649 regression correlation coefficients. Blue indicates a significant positive correlation, red  
650 indicates a significant negative correlation and grey indicates non-significant (p-value  
651 > 0.05) correlation. Proteins are clustered based on the correlation coefficients. Four  
652 pairs of ZBTB proteins selected for the heterodimers analysis in this study (PATZ1-  
653 PATZ2, BCL6-PATZ1, MIZ1-BCL6 and LRF-ThPOK) are highlighted in green.

654

655 **Figure S3.** Ribbon representation of selected BTB homodimer structures. The  
656 conservation was calculated by ConSurf and color coded as shown in the scale from  
657 blue (variable) to purple (conserved). Secondary structure features are labelled on  
658 PATZ1 BTB dimer. Exposed protein surfaces are less conserved than buried and  
659 dimer interface regions. PATZ2 and ThPOK dimers are based on novel modelled  
660 structured.

661

662 **Figure S4.** Dimerization interface in the BTB homodimers of PATZ1 (a; two  
663 independent simulations), BCL6 (b), MIZ1 (c), LRF (d) and PATZ2 (e). For each  
664 protein, SASA values (Å<sup>2</sup>) are calculated separately for the dimer (red) and the single  
665 monomers (black and grey in the graph) through the simulation. In green, the BSA  
666 (Å<sup>2</sup>) obtained by subtracting the sum of the SASA of the two monomers from the SASA  
667 of the complex dimer. Below each figure, the minimum, maximum and average values  
668 of BSA (Å<sup>2</sup>) are reported.

669

670 **Figure S5.** Dimerization interface in the BTB heterodimers of PATZ1-PATZ2 (a),  
671 BCL6-PATZ1 (b), BCL6-MIZ1 (c) and LRF-ThPOK (d). See caption to Fig. S4 for  
672 details.

673

674 **Figure S6.** Phylogenetic Tree of the ZBTB family. The BTB domain sequences of all  
675 ZBTB family proteins were used in Blast search and the phylogenetic tree was  
676 constructed from the MSA of the top 10 Blast hits.

677

## 678 Table S1. List of cloning primers

| OLIGONUCLEOTIDE NAME  | SEQUENCE                             | PURPOSE        |
|-----------------------|--------------------------------------|----------------|
| BCL6-BTB-XhoI-Forward | TGGACTCGAGGGATGGCCTCGCCGGCT<br>GACAG | F2H<br>cloning |

|                          |                                                     |                |
|--------------------------|-----------------------------------------------------|----------------|
| BCL6-BTB-NotI-Reverse    | GGACGCGGCCGCTTATTCCTACTGGCCTTA<br>ATAAACTTCCGGCAAG  | F2H<br>cloning |
| KAISO-BTB-XhoI-Forward   | TGGA CT CGAGGGATGGAGAGTAGAAAAC<br>TGATTTCTGC        | F2H<br>cloning |
| KAISO-BTB-NotI-Reverse   | GGACGCGGCCGCTTACTGTGACAATGGG<br>ACACCAA             | F2H<br>cloning |
| LRF-BTB-XhoI-Forward     | TGGA CT CGAGGGATGGCCGGCGGCGTG<br>GA                 | F2H<br>cloning |
| LRF-BTB-NotI-Reverse     | GGACGCGGCCGCTTAGATCTGCCGGTC<br>CAGGAGGTCG           | F2H<br>cloning |
| MIZ1-BTB- XhoI-Forward   | TGGA CT CGAGGGATGGACTTTCCCCAGC<br>ACAGCCAGC         | F2H<br>cloning |
| MIZ1-BTB-NotI-Reverse    | GGACGCGGCCGCTTAAGCAAGTGACTTG<br>AGGGCATGGCAG        | F2H<br>cloning |
| PATZ2-BTB-XhoI-Forward   | TGGA CT CGAGGGATGGCAGAAACATCGC<br>CAGAG             | F2H<br>cloning |
| PATZ2-BTB-NotI-Reverse   | GGACGCGGCCGCTTAGCTATGATTATTTT<br>GGAAGTCTGTGTAAGC   | F2H<br>cloning |
| PLZF-BTB-XhoI-Forward    | TGGA CT CGAGGGATGGATCTGACAAAAA<br>TGGGCATGA         | F2H<br>cloning |
| PLZF-BTB-NotI-Reverse    | GGACGCGGCCGCTTACTGGATGGTCTCC<br>AGCATCTTCAG         | F2H<br>cloning |
| PATZ1-BTB-XhoI-Forward   | TGGA CT CGAGGGATGGAGCGGGTCAAC<br>GACGCTTC           | F2H<br>cloning |
| PATZ1-BTB-NotI-Reverse   | GGACGCGGCCGCTTAGGACTGTTTGATT<br>ACTTCCTGGCAGATC     | F2H<br>cloning |
| ThPOK-BTB-SmaI-Forward   | TGGACCCGGGATGGGGAGCCCCGAGGA<br>TGAC                 | F2H<br>cloning |
| ThPOK-BTB-XhoI-Forward   | TGGA CT CGAGGGATGGGGAGCCCCGAG<br>GATGACCTGATT       | F2H<br>cloning |
| ThPOK-BTB-NotI-Reverse   | GGACGCGGCCGCTTATTA ACTGCCCTGC<br>AGAATCTCCATGCAAGCA | F2H<br>cloning |
| CMV Forward              | CGCAAATGGGCGGTAGGCGTG                               | F2H<br>cloning |
| TagGFP-XhoI&SmaI-Reverse | GGACCTCGAGGGACCCCGGGAGAACCG<br>CTGTACAGCTCGTCCATGCC | F2H<br>cloning |
| LacI-GBP-Forward         | TCAGCTAGCATGGCCGATGTGCAGCTGG<br>T                   | F2H<br>cloning |
| LacI-GBP-Reverse         | ATTGGATCCTCATCGGGAAACCTGTCGT<br>GC                  | F2H<br>cloning |

679

## 680 Acknowledgements

681

682 We thank Professor Dr Rémy Bosselut for helpful comments during the preparation of  
683 the manuscript.

684 This work was supported by TUBITAK grant number [118Z015 and 20AG007].

685

## 686 Footnotes

687

688 Author contributions were as follows: SP, CA and BE designed the study; LN, SB, HT,  
689 NT and MG performed and analyzed F2H assay; SP and CA performed and analyzed  
690 MD simulations; UA and OA Performed Bioinformatic analysis; SP, CA, OA and BE  
691 wrote the manuscript.

692 The BTB dimer models generated in this study are available in ModelArchive  
693 ([modelarchive.org](https://modelarchive.org)) with the accession codes ma-olypj (PATZ1 homodimer), ma-1iskk  
694 (PATZ2 homodimer), ma-zhxm1 (ThPOK homodimer), ma-hf06e (PATZ1-PATZ2  
695 heterodimer), ma-ql2m8 (BCL6-PATZ1 heterodimer), ma-wrsln (LRF-ThPOK  
696 heterodimer).  
697  
698



699  
700  
701  
702  
703  
704  
705  
706  
707  
708  
709  
710  
711  
712  
713  
714  
715  
716  
717  
718  
719  
720  
721  
722  
723  
724  
725  
726  
727  
728  
729  
730  
731  
732  
733  
734  
735  
736  
737  
738  
739  
740  
741  
742  
743  
744  
745  
746  
747  
748

## References

1. Siggs OM and Beutler B. The BTB-ZF transcription factors. *Cell Cycle* 2012; 11: 3358-3369. DOI: 10.4161/cc.21277.
2. Perez-Torrado R, Yamada D and Defossez PA. Born to bind: the BTB protein-protein interaction domain. *Bioessays* 2006; 28: 1194-1202. DOI: 10.1002/bies.20500.
3. Stogios PJ, Chen L and Prive GG. Crystal structure of the BTB domain from the LRF/ZBTB7 transcriptional regulator. *Protein Sci* 2007; 16: 336-342. DOI: 10.1110/ps.062660907.
4. Ahmad KF, Engel CK and Prive GG. Crystal structure of the BTB domain from PLZF. *Proc Natl Acad Sci U S A* 1998; 95: 12123-12128.
5. Stogios PJ, Cuesta-Seijo JA, Chen L, et al. Insights into strand exchange in BTB domain dimers from the crystal structures of FAZF and Miz1. *J Mol Biol* 2010; 400: 983-997. DOI: 10.1016/j.jmb.2010.05.028.
6. Piepoli S, Alt AO, Atilgan C, et al. Structural analysis of the PATZ1 BTB domain homodimer. *Acta Crystallographica Section D* 2020; 76: 581-593. DOI: doi:10.1107/S2059798320005355.
7. Ahmad KF, Melnick A, Lax S, et al. Mechanism of SMRT corepressor recruitment by the BCL6 BTB domain. *Mol Cell* 2003; 12: 1551-1564.
8. Cooper CDOM, J.W.; Bullock, A.; Pike, A.C.W.; von Delft, F.; Filippakopoulos PS, E.; Edwards, A.; Arrowsmith, C.H.; Bountra, C.; and Weigelt JK, S. Crystal structure of the BTB domain of human myoneurin. 2008. DOI: 10.2210/pdb2VPK/pdb.
9. Stogios PJC, L.; Prive, G.G. Crystal structure of the BTB domain from Kaiso/ZBTB33, form I. 2010. DOI: 10.2210/pdb3M4T/pdb.
10. Filippakopoulos PB, A.; Cooper, C.; Keates, T.; Salah, E.; Pilka, E.; Pike ACWvD, F.; Arrowsmith, C.H.; Edwards, A.M.; Weigelt, J.; and Knapp SSGCS. Crystal structure of the human BTB domain of the Krueppel related Zinc Finger Protein 3 (HKR3). 2007. DOI: 10.2210/pdb3B84/pdb.
11. Stogios PJ, Downs GS, Jauhal JJ, et al. Sequence and structural analysis of BTB domain proteins. *Genome Biol* 2005; 6: R82. DOI: 10.1186/gb-2005-6-10-r82.
12. Chevrier S and Corcoran LM. BTB-ZF transcription factors, a growing family of regulators of early and late B-cell development. *Immunol Cell Biol* 2014; 92: 481-488. DOI: 10.1038/icb.2014.20.
13. Oughtred R, Rust J, Chang C, et al. The BioGRID database: A comprehensive biomedical resource of curated protein, genetic, and chemical interactions. *Protein Sci* 2021; 30: 187-200. 2020/10/19. DOI: 10.1002/pro.3978.
14. Kobayashi A, Yamagiwa H, Hoshino H, et al. A combinatorial code for gene expression generated by transcription factor Bach2 and MAZR (MAZ-related factor) through the BTB/POZ domain. *Mol Cell Biol* 2000; 20: 1733-1746.
15. Stead MA and Wright SC. Structures of heterodimeric POZ domains of Miz1/BCL6 and Miz1/NAC1. *Acta Crystallogr F Struct Biol Commun* 2014; 70: 1591-1596. DOI: 10.1107/S2053230X14023449.
16. Heng TS and Painter MW. The Immunological Genome Project: networks of gene expression in immune cells. *Nat Immunol* 2008; 9: 1091-1094. 2008/09/19. DOI: 10.1038/ni1008-1091.
17. Rosbrook GO, Stead MA, Carr SB, et al. The structure of the Bach2 POZ-domain dimer reveals an intersubunit disulfide bond. *Acta Crystallogr D Biol Crystallogr* 2012; 68: 26-34. 2011/12/24. DOI: 10.1107/s0907444911048335.

- 749 18. Rothbauer U, Zolghadr K, Tillib S, et al. Targeting and tracing antigens in live  
750 cells with fluorescent nanobodies. *Nat Methods* 2006; 3: 887-889. 2006/10/25. DOI:  
751 10.1038/nmeth953.
- 752 19. Zolghadr K, Mortusewicz O, Rothbauer U, et al. A fluorescent two-hybrid  
753 assay for direct visualization of protein interactions in living cells. *Mol Cell*  
754 *Proteomics* 2008; 7: 2279-2287. 2008/07/16. DOI: 10.1074/mcp.M700548-MCP200.
- 755 20. Zolghadr K, Rothbauer U and Leonhardt H. The fluorescent two-hybrid (F2H)  
756 assay for direct analysis of protein-protein interactions in living cells. *Methods Mol*  
757 *Biol* 2012; 812: 275-282. 2012/01/06. DOI: 10.1007/978-1-61779-455-1\_16.
- 758 21. Bolte S and Cordelières FP. A guided tour into subcellular colocalization  
759 analysis in light microscopy. *J Microsc* 2006; 224: 213-232. 2007/01/11. DOI:  
760 10.1111/j.1365-2818.2006.01706.x.
- 761 22. Schneider CA, Rasband WS and Eliceiri KW. NIH Image to ImageJ: 25 years  
762 of image analysis. *Nat Methods* 2012; 9: 671-675. 2012/08/30. DOI:  
763 10.1038/nmeth.2089.
- 764 23. Schindelin J, Arganda-Carreras I, Frise E, et al. Fiji: an open-source platform  
765 for biological-image analysis. *Nat Methods* 2012; 9: 676-682. 2012/06/30. DOI:  
766 10.1038/nmeth.2019.
- 767 24. Altschul SF, Madden TL, Schäffer AA, et al. Gapped BLAST and PSI-BLAST:  
768 a new generation of protein database search programs. *Nucleic Acids Res* 1997; 25:  
769 3389-3402. 1997/09/01. DOI: 10.1093/nar/25.17.3389.
- 770 25. Bateman A, Martin MJ, Orchard S, et al. UniProt: a worldwide hub of protein  
771 knowledge. *Nucleic Acids Research* 2019; 47: D506-D515. DOI:  
772 10.1093/nar/gky1049.
- 773 26. Katoh K, Misawa K, Kuma K, et al. MAFFT: a novel method for rapid multiple  
774 sequence alignment based on fast Fourier transform. *Nucleic Acids Res* 2002; 30:  
775 3059-3066. 2002/07/24. DOI: 10.1093/nar/gkf436.
- 776 27. Price MN, Dehal PS and Arkin AP. FastTree 2--approximately maximum-  
777 likelihood trees for large alignments. *PLoS One* 2010; 5: e9490. 2010/03/13. DOI:  
778 10.1371/journal.pone.0009490.
- 779 28. Ashkenazy H, Abadi S, Martz E, et al. ConSurf 2016: an improved  
780 methodology to estimate and visualize evolutionary conservation in macromolecules.  
781 *Nucleic Acids Res* 2016; 44: W344-350. 2016/05/12. DOI: 10.1093/nar/gkw408.
- 782 29. Humphrey W, Dalke A and Schulten K. VMD: visual molecular dynamics. *J*  
783 *Mol Graph* 1996; 14: 33-38, 27-38.
- 784 30. Fiser A and Sali A. ModLoop: automated modeling of loops in protein  
785 structures. *Bioinformatics* 2003; 19: 2500-2501. 2003/12/12.
- 786 31. Hatherley R, Brown DK, Glenister M, et al. PRIMO: An Interactive Homology  
787 Modeling Pipeline. *PLoS One* 2016; 11: e0166698. 2016/11/18. DOI:  
788 10.1371/journal.pone.0166698.
- 789 32. Waterhouse A, Bertoni M, Bienert S, et al. SWISS-MODEL: homology  
790 modelling of protein structures and complexes. *Nucleic Acids Res* 2018; 46: W296-  
791 W303. 2018/05/23. DOI: 10.1093/nar/gky427.
- 792 33. Baspinar A, Cukuroglu E, Nussinov R, et al. PRISM: a web server and  
793 repository for prediction of protein-protein interactions and modeling their 3D  
794 complexes. *Nucleic Acids Res* 2014; 42: W285-289. 2014/05/16. DOI:  
795 10.1093/nar/gku397.
- 796 34. Best RB, Zhu X, Shim J, et al. Optimization of the additive CHARMM all-atom  
797 protein force field targeting improved sampling of the backbone  $\phi$ ,  $\psi$  and side-chain

- 798  $\chi(1)$  and  $\chi(2)$  dihedral angles. *J Chem Theory Comput* 2012; 8: 3257-3273.  
799 2013/01/24. DOI: 10.1021/ct300400x.
- 800 35. Phillips JC, Braun R, Wang W, et al. Scalable molecular dynamics with  
801 NAMD. *J Comput Chem* 2005; 26: 1781-1802. DOI: 10.1002/jcc.20289.
- 802 36. Darden T, Perera L, Li LP, et al. New tricks for modelers from the  
803 crystallography toolkit: the particle mesh Ewald algorithm and its use in nucleic acid  
804 simulations. *Structure with Folding & Design* 1999; 7: R55-R60. DOI: Doi  
805 10.1016/S0969-2126(99)80033-1.
- 806 37. Hou T, Wang J, Li Y, et al. Assessing the performance of the MM/PBSA and  
807 MM/GBSA methods. 1. The accuracy of binding free energy calculations based on  
808 molecular dynamics simulations. *J Chem Inf Model* 2011; 51: 69-82. 2010/12/02.  
809 DOI: 10.1021/ci100275a.
- 810 38. Radak B. pynamd. GitHub2021.
- 811 39. Huttlin EL, Ting L, Bruckner RJ, et al. The BioPlex Network: A Systematic  
812 Exploration of the Human Interactome. *Cell* 2015; 162: 425-440. 2015/07/18. DOI:  
813 10.1016/j.cell.2015.06.043.
- 814 40. Widom RL, Lee JY, Joseph C, et al. The hcKrox gene family regulates  
815 multiple extracellular matrix genes. *Matrix Biol* 2001; 20: 451-462. 2001/11/03. DOI:  
816 10.1016/s0945-053x(01)00167-6.
- 817 41. Vacchio MS, Wang L, Bouladoux N, et al. A ThPOK-LRF transcriptional node  
818 maintains the integrity and effector potential of post-thymic CD4+ T cells. *Nat*  
819 *Immunol* 2014; 15: 947-956. 2014/08/19. DOI: 10.1038/ni.2960.
- 820 42. Melnick A, Ahmad KF, Arai S, et al. In-depth mutational analysis of the  
821 promyelocytic leukemia zinc finger BTB/POZ domain reveals motifs and residues  
822 required for biological and transcriptional functions. *Molecular and Cellular Biology*  
823 2000; 20: 6550-6567. DOI: Doi 10.1128/Mcb.20.17.6550-6567.2000.
- 824 43. Mena EL, Jevtic P, Greber BJ, et al. Structural basis for dimerization quality  
825 control. *Nature* 2020 2020/08/21. DOI: 10.1038/s41586-020-2636-7.
- 826 44. Sensoy O, Atilgan AR and Atilgan C. FbpA iron storage and release are  
827 governed by periplasmic microenvironments. *Phys Chem Chem Phys* 2017; 19:  
828 6064-6075. 2017/02/14. DOI: 10.1039/c6cp06961d.
- 829 45. de Greef JC, Wang J, Balog J, et al. Mutations in ZBTB24 are associated with  
830 immunodeficiency, centromeric instability, and facial anomalies syndrome type 2. *Am*  
831 *J Hum Genet* 2011; 88: 796-804. 2011/05/21. DOI: 10.1016/j.ajhg.2011.04.018.
- 832 46. Wu H, Thijssen PE, de Klerk E, et al. Converging disease genes in ICF  
833 syndrome: ZBTB24 controls expression of CDCA7 in mammals. *Hum Mol Genet*  
834 2016; 25: 4041-4051. 2016/07/29. DOI: 10.1093/hmg/ddw243.
- 835 47. Thompson JJ, Kaur R, Sosa CP, et al. ZBTB24 is a transcriptional regulator  
836 that coordinates with DNMT3B to control DNA methylation. *Nucleic Acids Res* 2018;  
837 46: 10034-10051. 2018/08/08. DOI: 10.1093/nar/gky682.
- 838 48. Keskin N, Deniz E, Eryilmaz J, et al. PATZ1 Is a DNA Damage-Responsive  
839 Transcription Factor That Inhibits p53 Function. *Mol Cell Biol* 2015; 35: 1741-1753.  
840 DOI: 10.1128/MCB.01475-14.
- 841 49. Melnick A, Carlile G, Ahmad KF, et al. Critical residues within the BTB domain  
842 of PLZF and Bcl-6 modulate interaction with corepressors. *Mol Cell Biol* 2002; 22:  
843 1804-1818.
- 844 50. Zacharchenko T and Wright S. Functionalization of the BCL6 BTB domain into  
845 a noncovalent crystallization chaperone. *IUCrJ* 2021; 8: 154-160. 2021/03/13. DOI:  
846 10.1107/s2052252520015754.

- 847 51. Ghetu AF, Corcoran CM, Cerchietti L, et al. Structure of a BCOR corepressor  
848 peptide in complex with the BCL6 BTB domain dimer. *Mol Cell* 2008; 29: 384-391.  
849 DOI: 10.1016/j.molcel.2007.12.026.
- 850 52. Bilic I, Koesters C, Unger B, et al. Negative regulation of CD8 expression via  
851 Cd8 enhancer-mediated recruitment of the zinc finger protein MAZR. *Nat Immunol*  
852 2006; 7: 392-400. DOI: 10.1038/ni1311.
- 853 53. Granadino-Roldan JM, Obiol-Pardo C, Pinto M, et al. Molecular dynamics  
854 analysis of the interaction between the human BCL6 BTB domain and its SMRT,  
855 NcoR and BCOR corepressors: the quest for a consensus dynamic pharmacophore.  
856 *J Mol Graph Model* 2014; 50: 142-151. DOI: 10.1016/j.jmkgm.2014.04.003.
- 857 54. Orth B, Sander B, Möglich A, et al. Identification of an atypical interaction site  
858 in the BTB domain of the MYC-interacting zinc-finger protein 1. *Structure* 2021  
859 2021/06/30. DOI: 10.1016/j.str.2021.06.005.
- 860 55. Bertolini M, Fenzl K, Kats I, et al. Interactions between nascent proteins  
861 translated by adjacent ribosomes drive homomer assembly. *Science* 2021; 371: 57-  
862 64. 2021/01/02. DOI: 10.1126/science.abc7151.
- 863 56. Mena EL, Kjolby RAS, Saxton RA, et al. Dimerization quality control ensures  
864 neuronal development and survival. *Science* 2018; 362: 198-+. DOI: ARTN  
865 eaap8236  
866 10.1126/science.aap8236.
- 867 57. Yurlova L, Derks M, Buchfellner A, et al. The fluorescent two-hybrid assay to  
868 screen for protein-protein interaction inhibitors in live cells: targeting the interaction of  
869 p53 with Mdm2 and Mdm4. *J Biomol Screen* 2014; 19: 516-525. 2014/01/31. DOI:  
870 10.1177/1087057113518067.
- 871 58. Lodermeier V, Ssebyatika G, Passos V, et al. The Antiviral Activity of the  
872 Cellular Glycoprotein LGALS3BP/90K Is Species Specific. *J Virol* 2018; 92  
873 2018/05/11. DOI: 10.1128/jvi.00226-18.  
874

# Figure 1

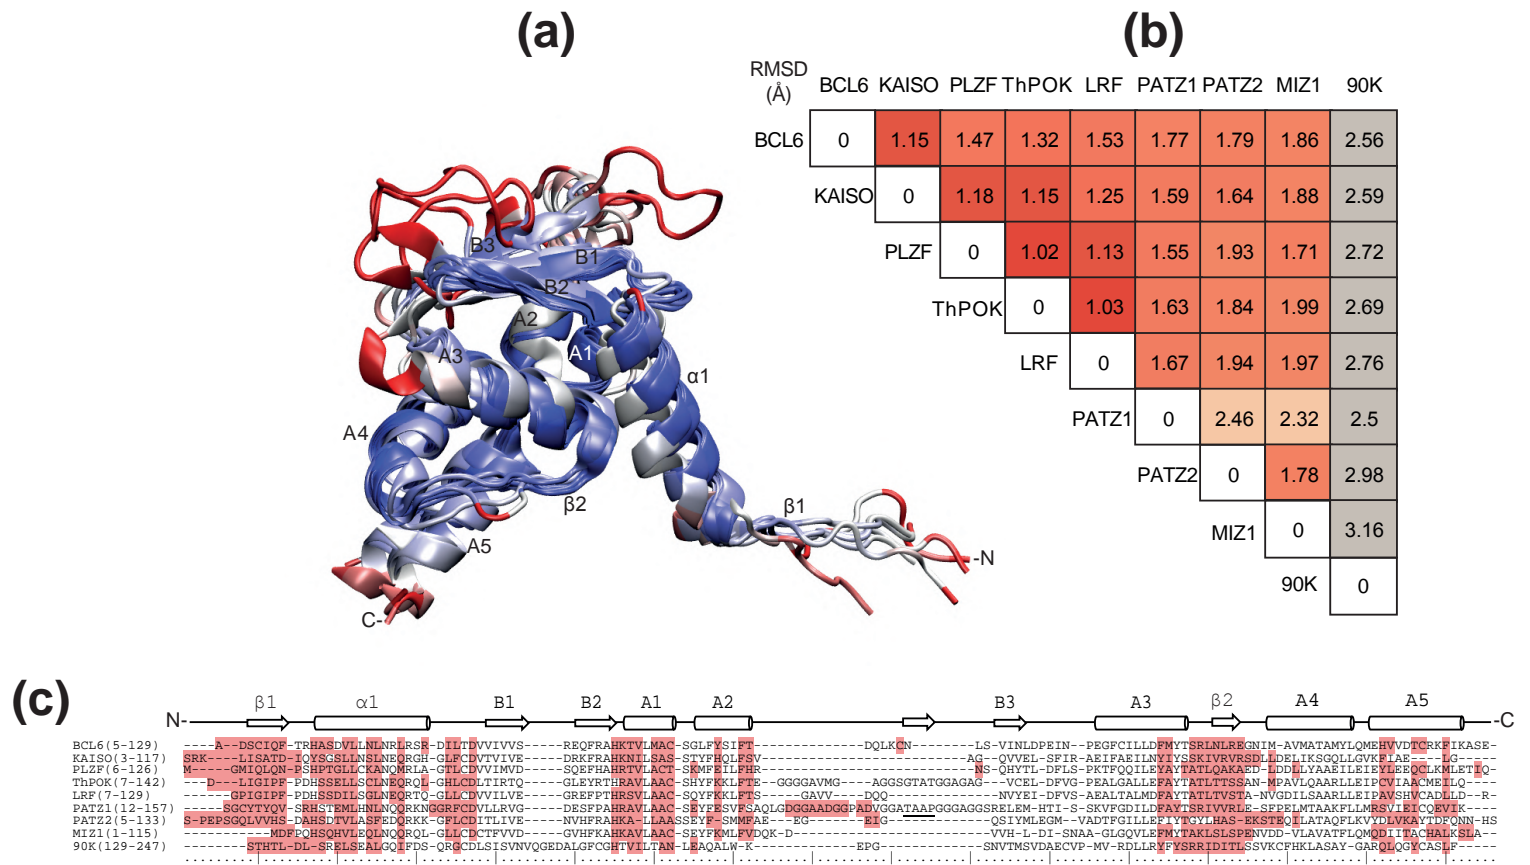



# Figure 2

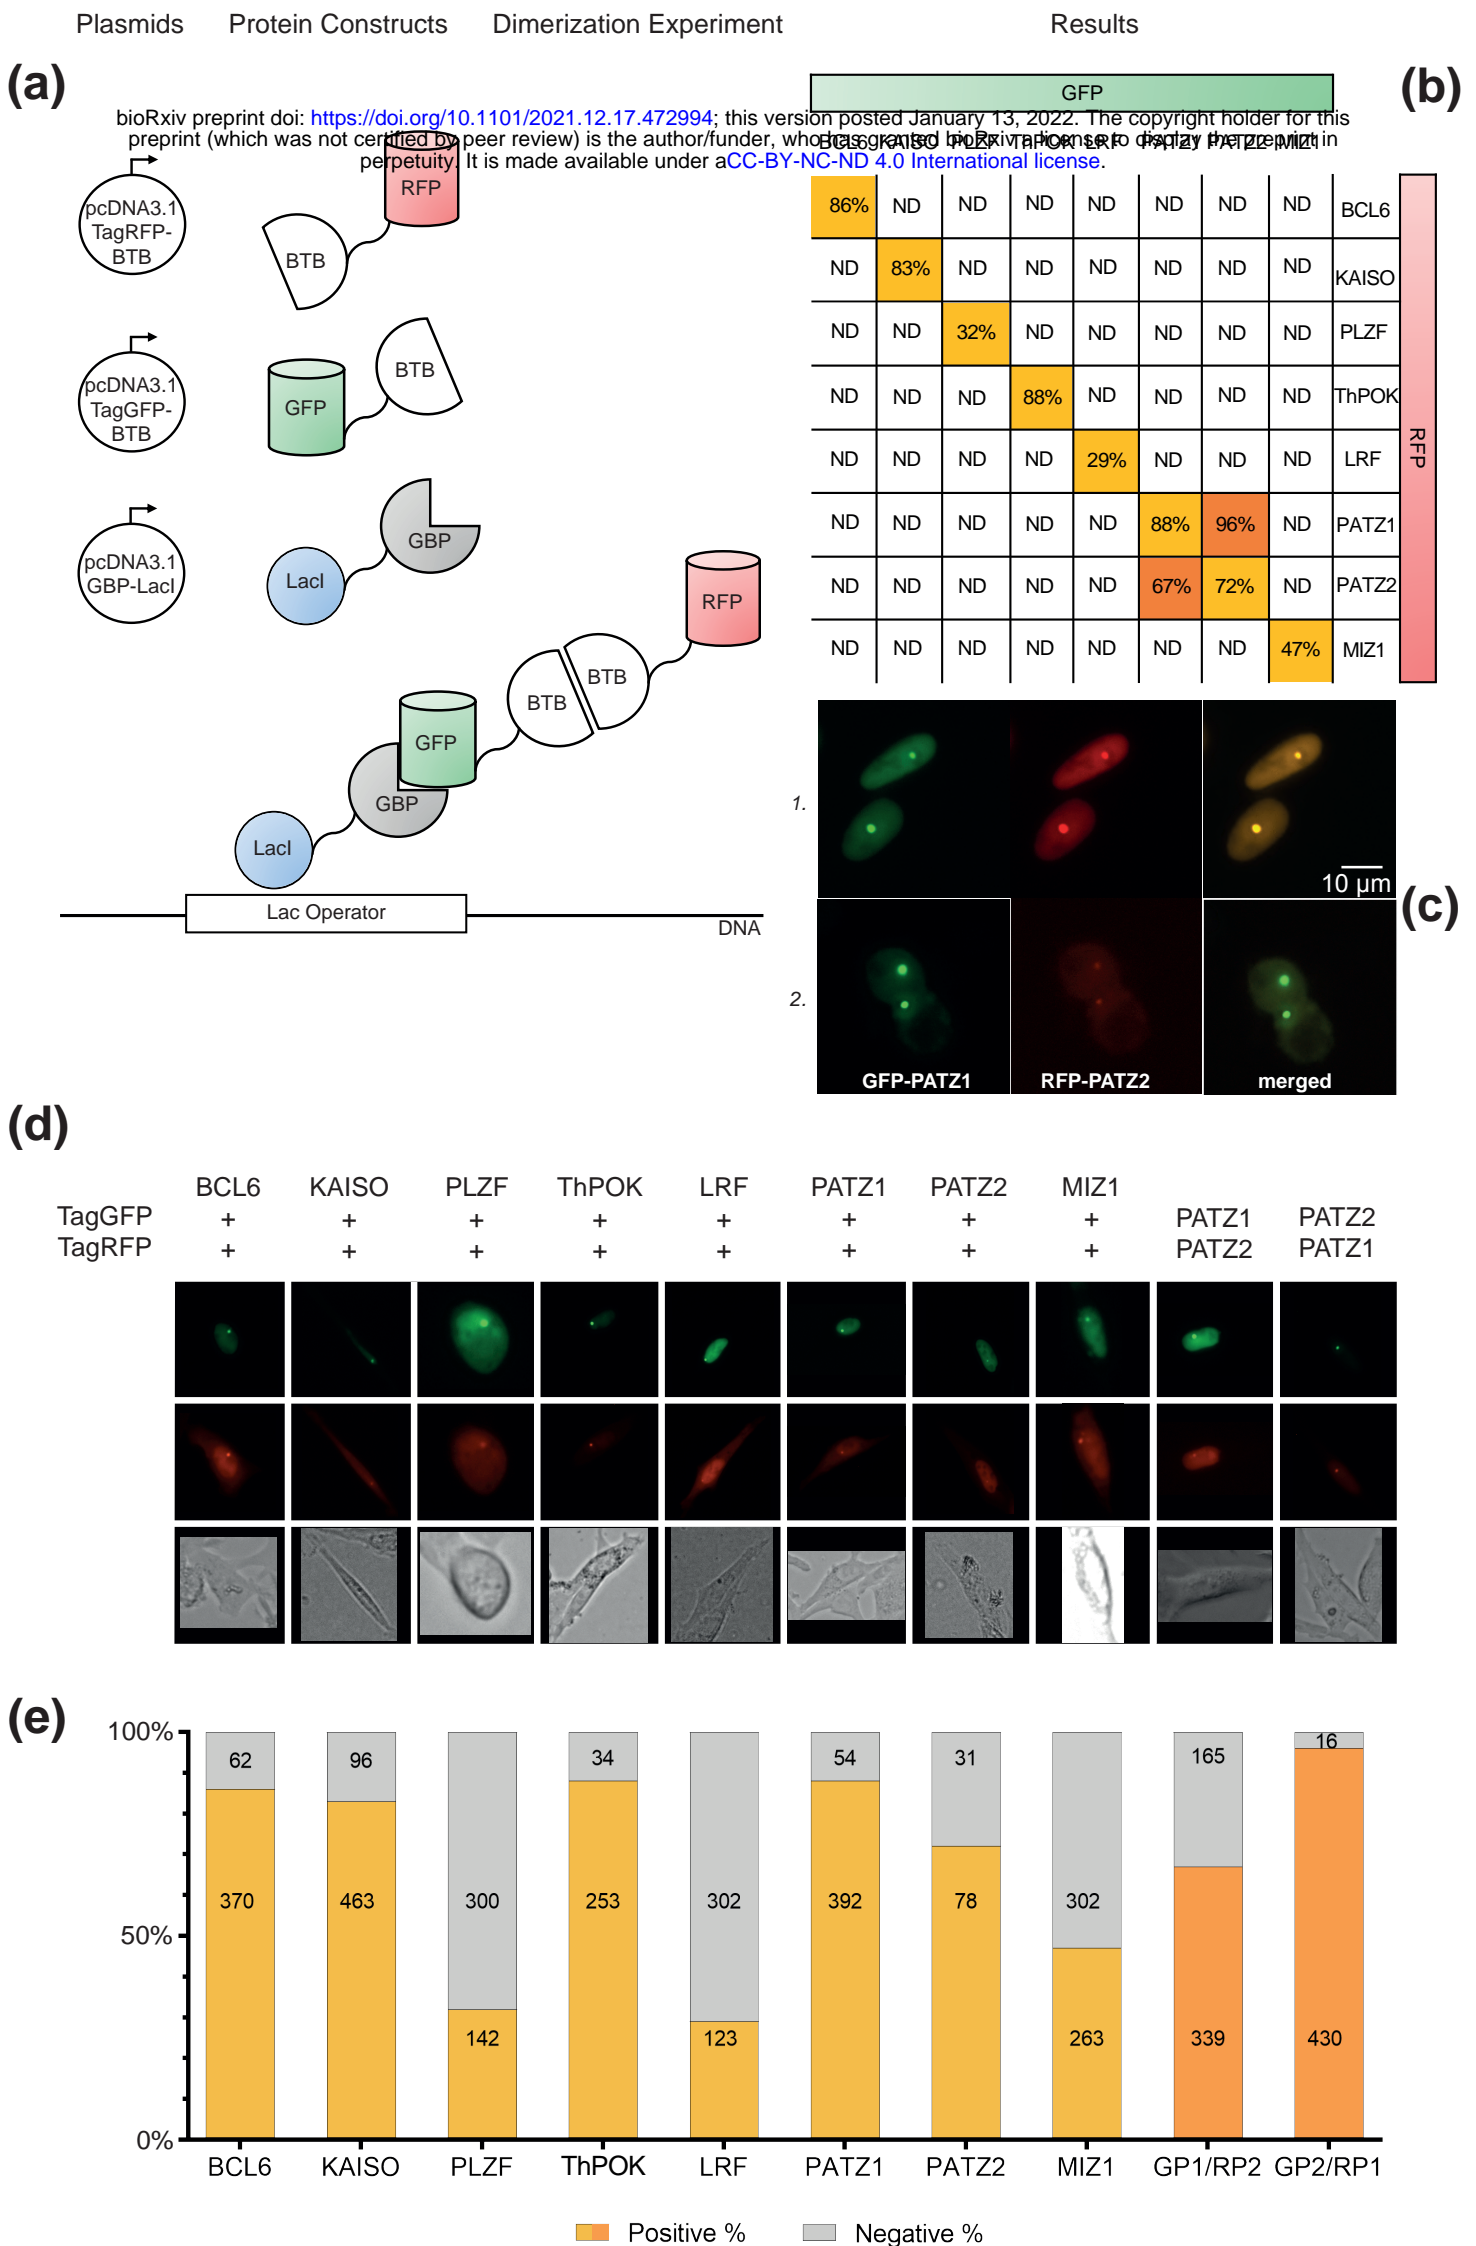



Figure 3

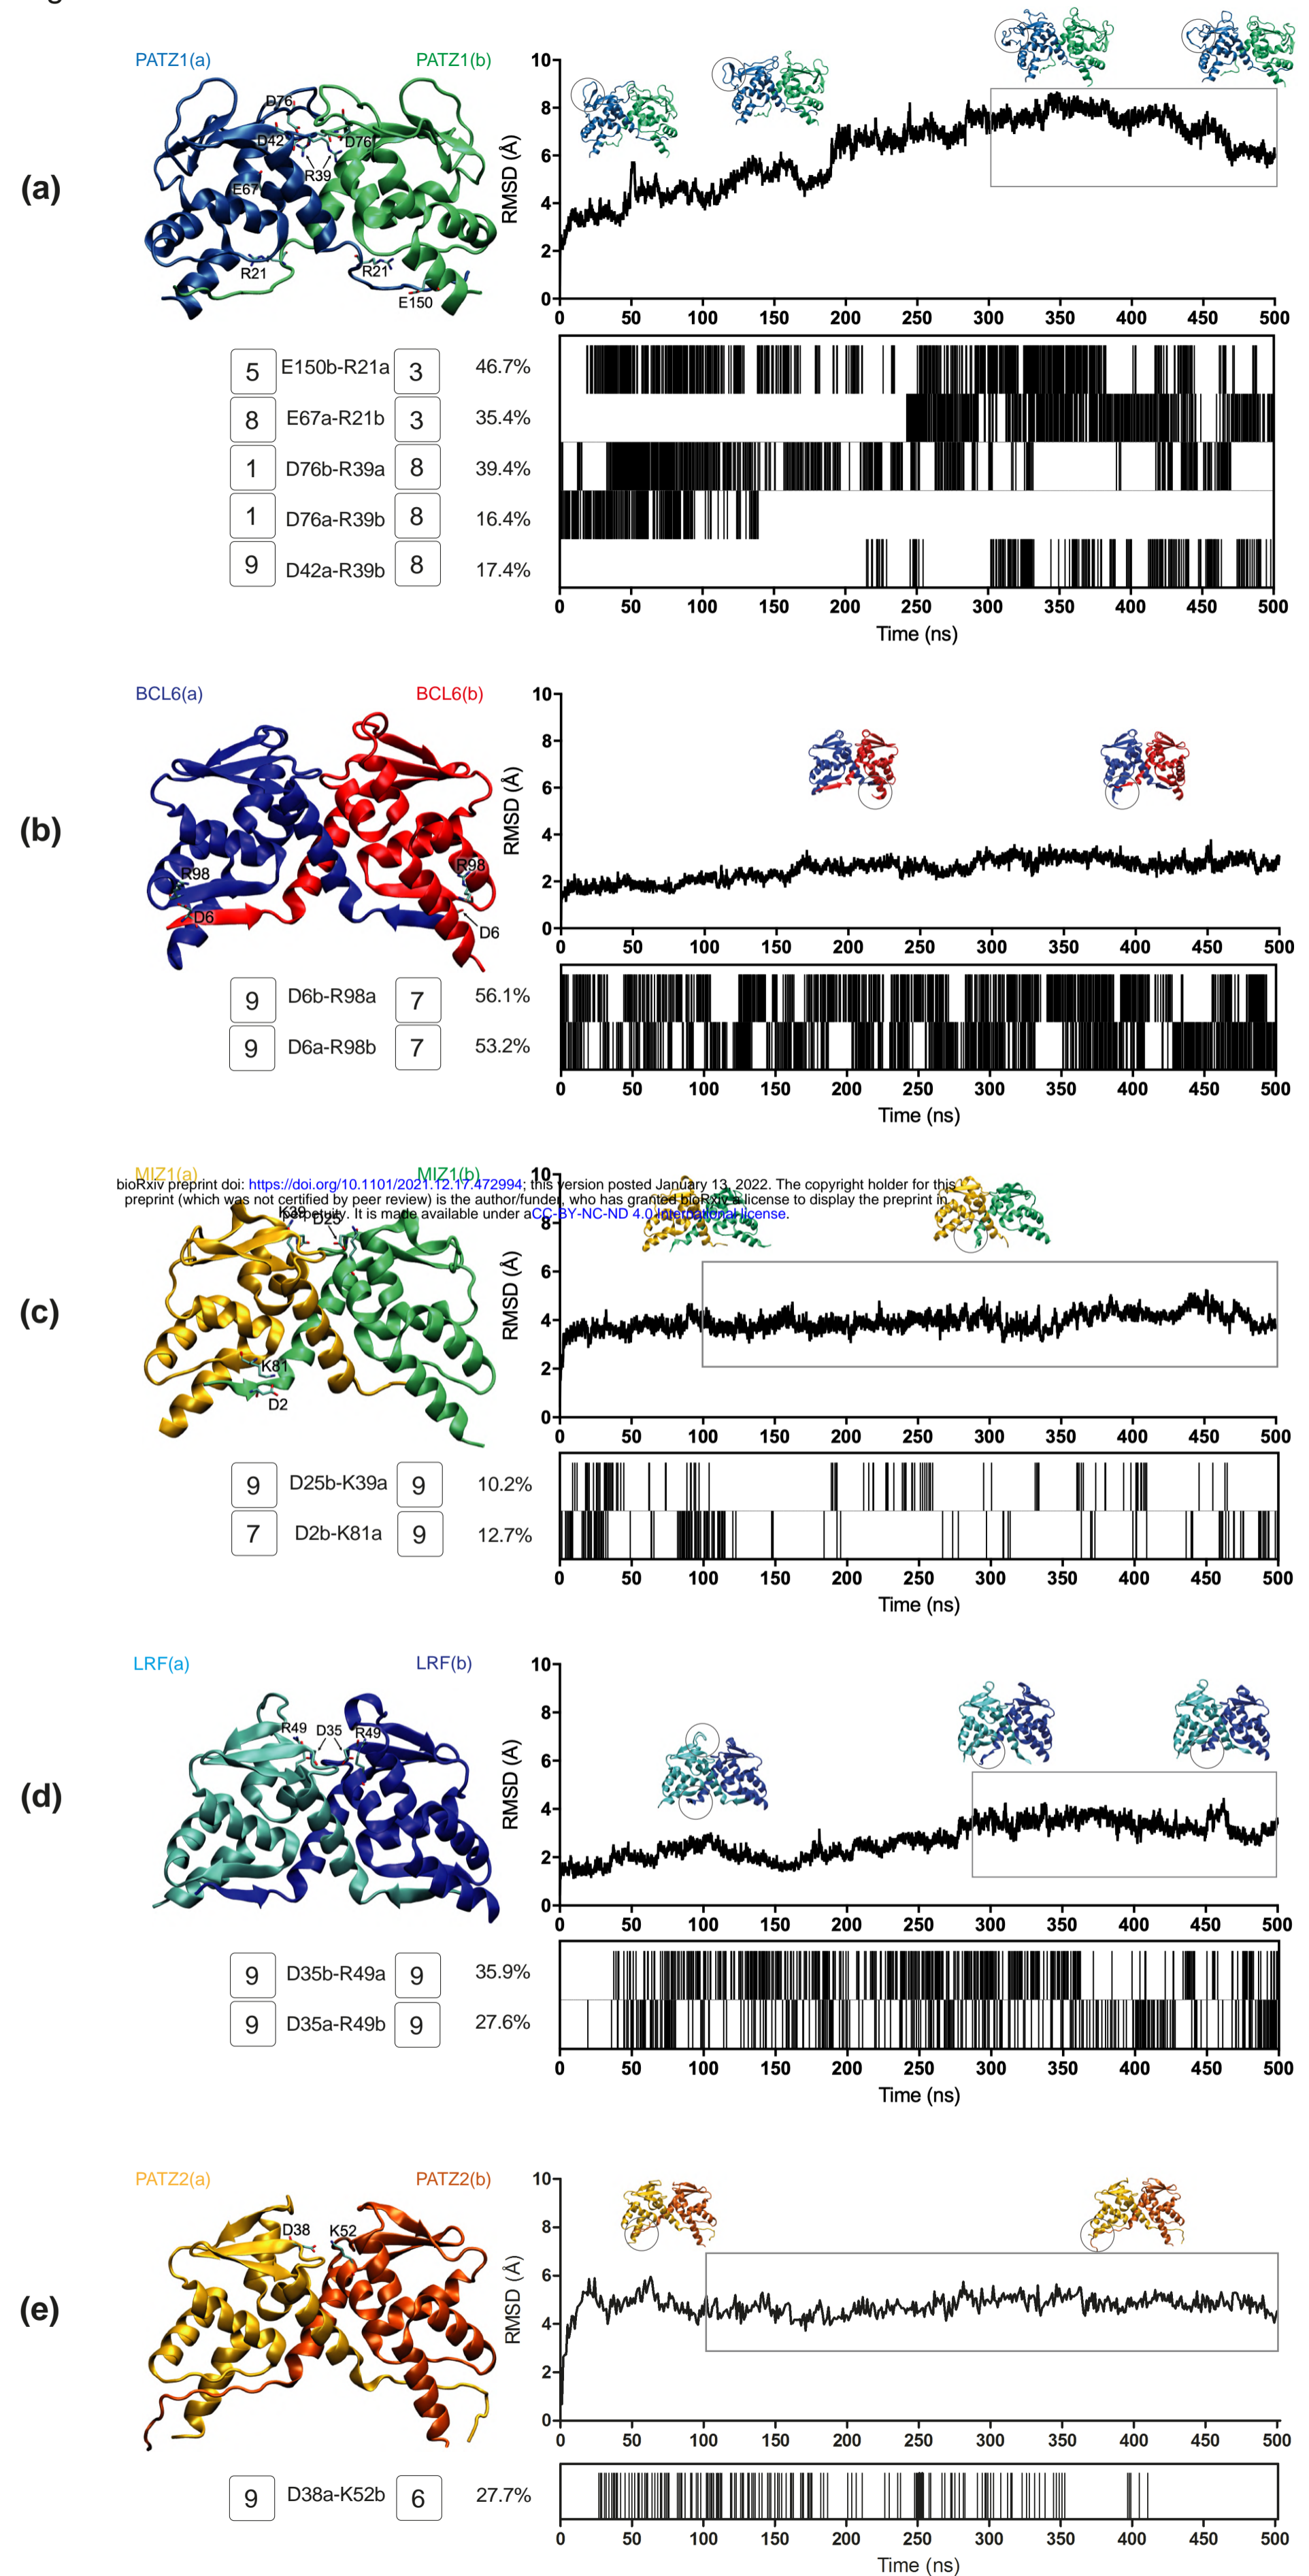



Figure 4

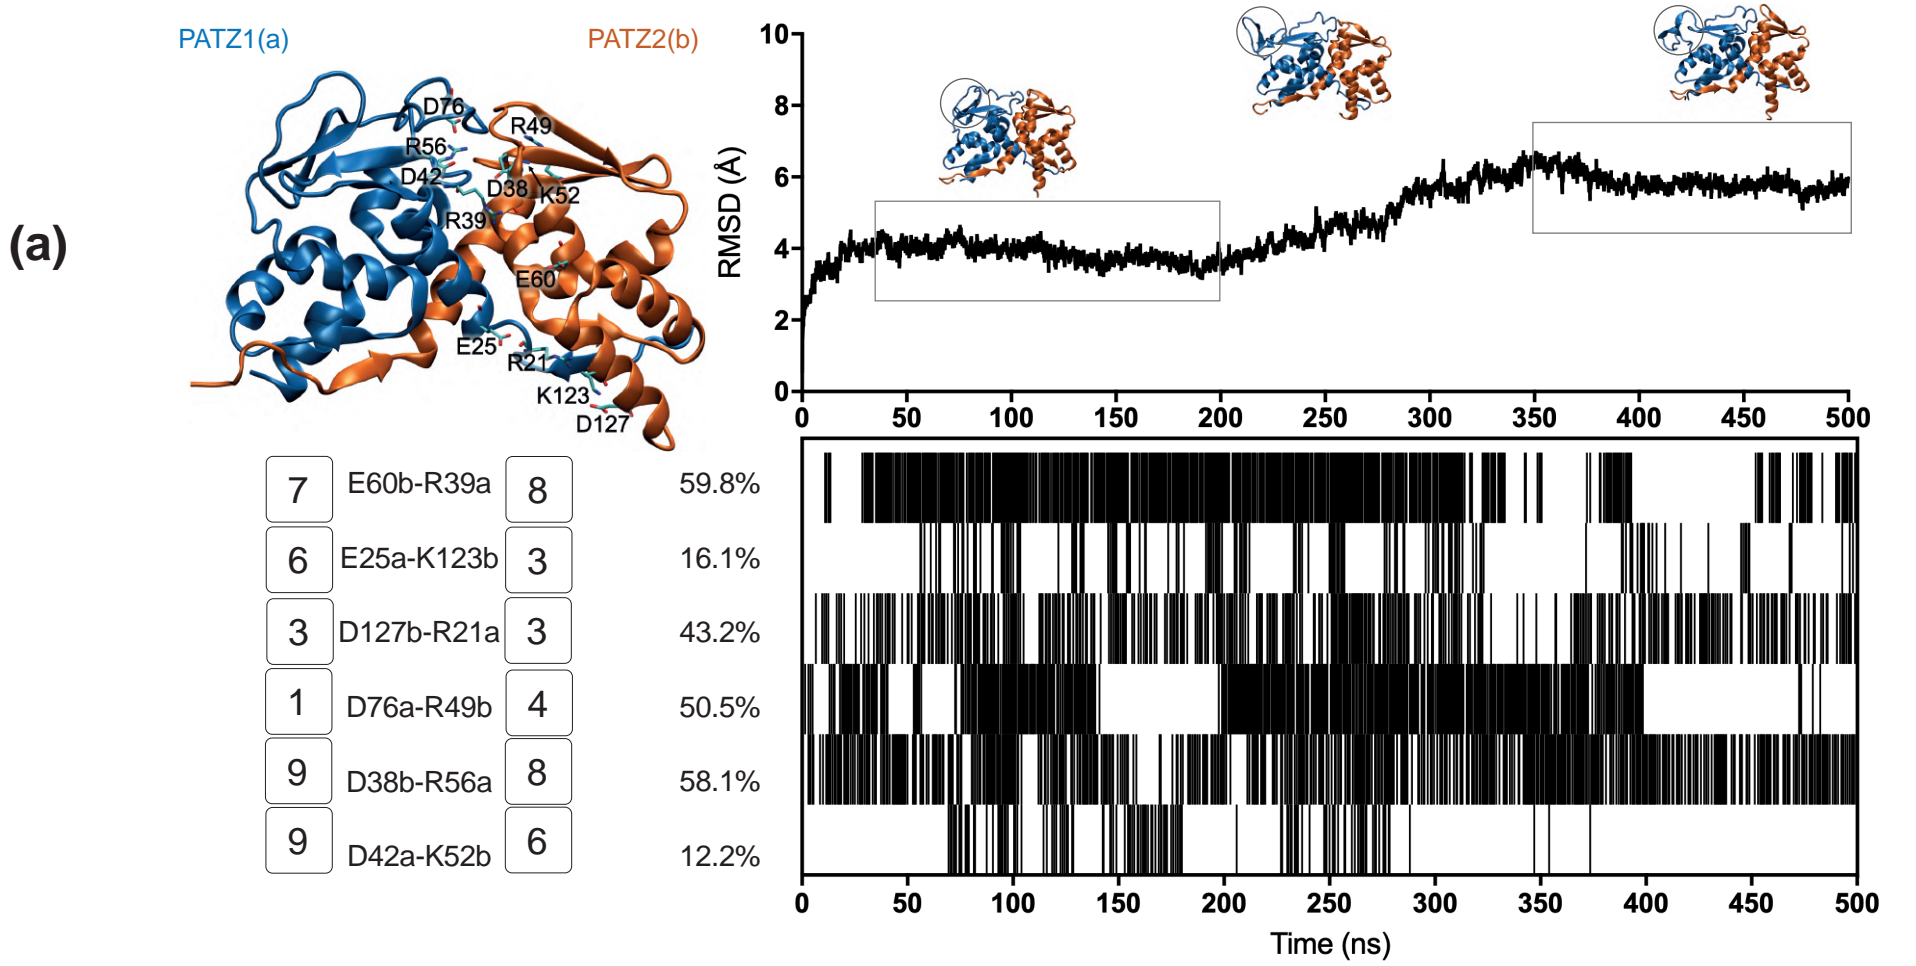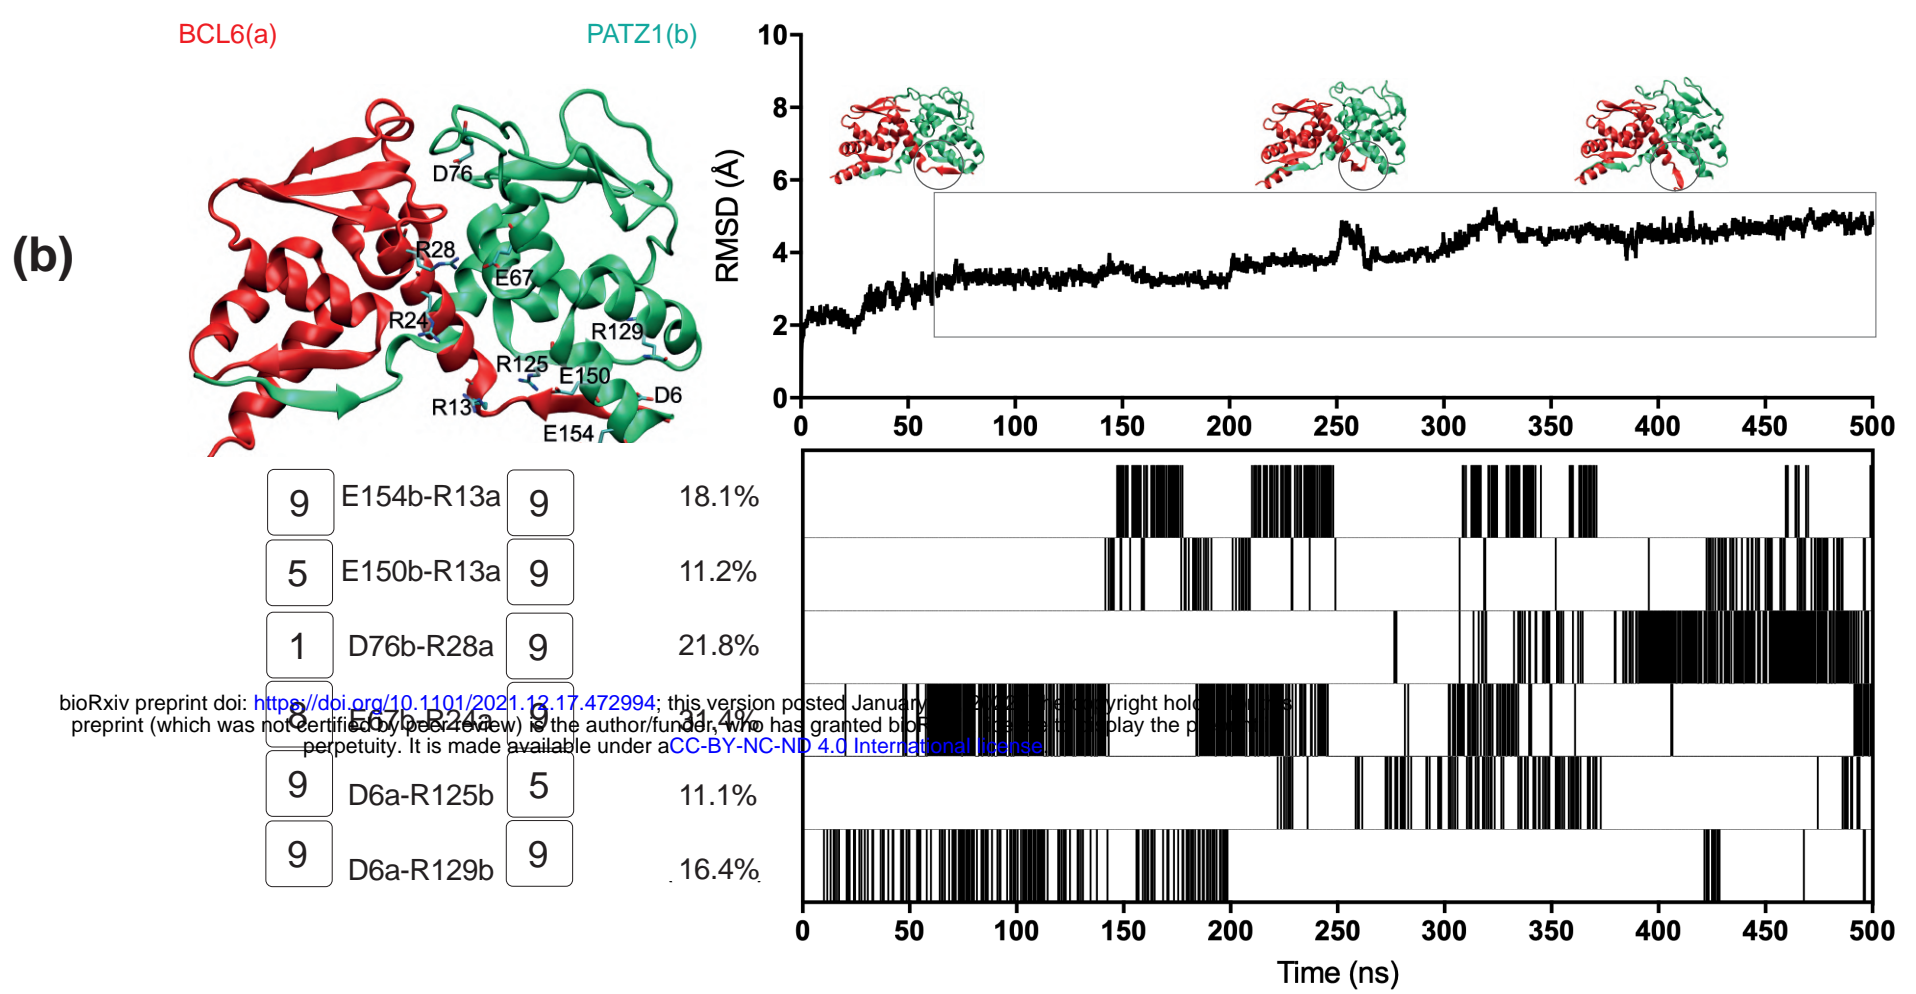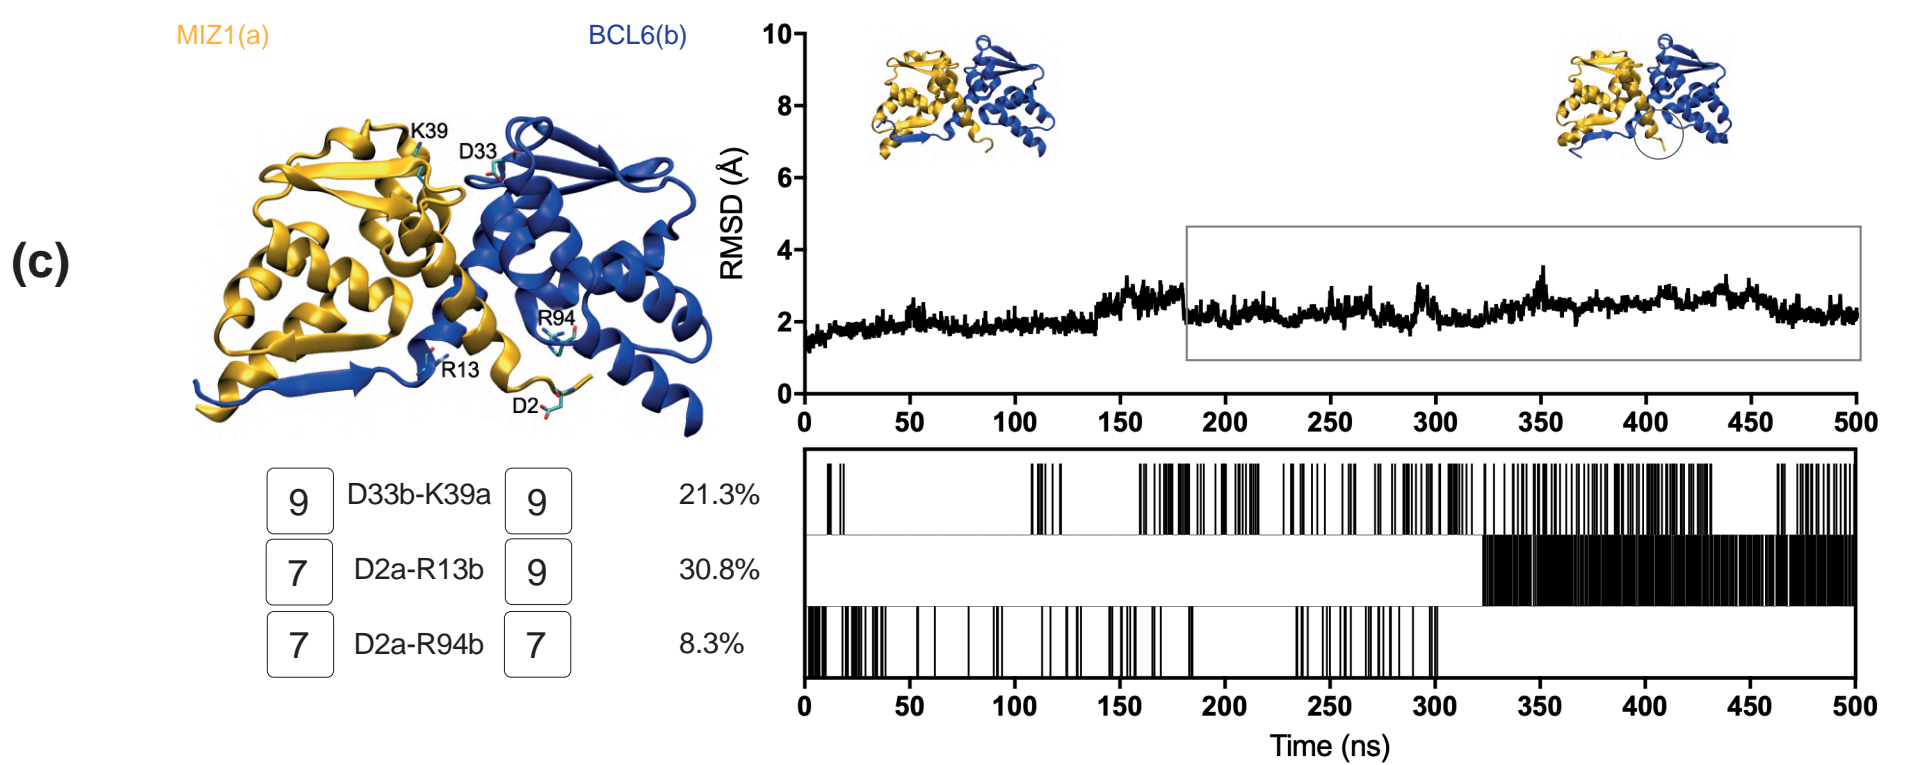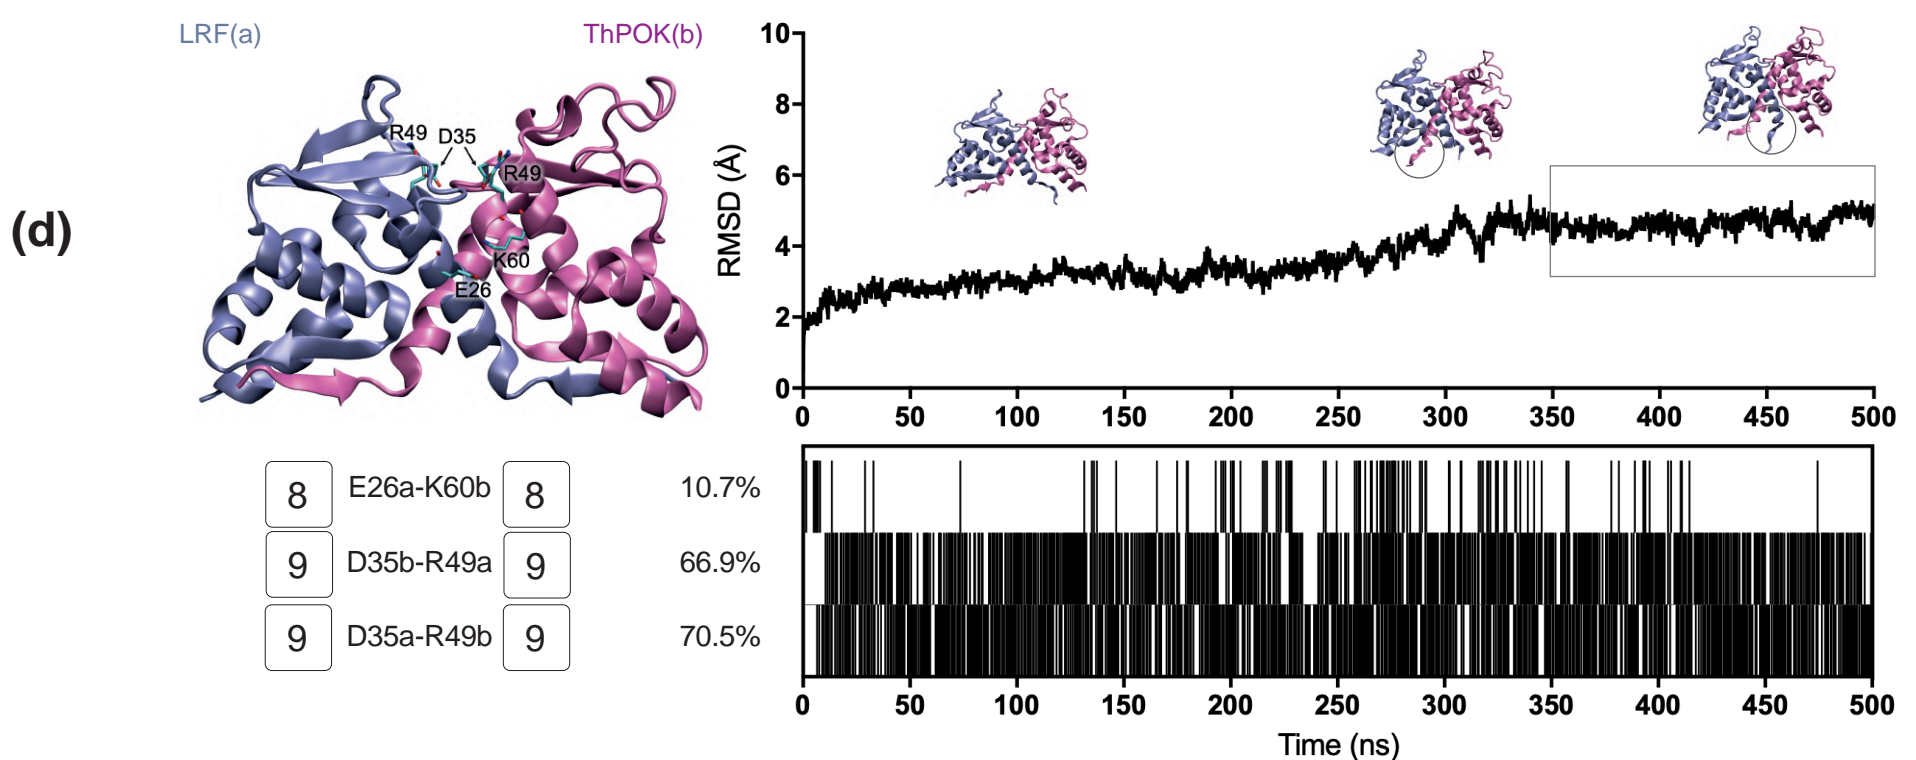

# Figure S1

| Patz1-Patz2                    |         |                 |           |
|--------------------------------|---------|-----------------|-----------|
| Cell Type                      | R-value | P-value (0.05)  | -log10(p) |
| B Cells                        | 0.433   | 0.0000737       | 4.133     |
| T Cells                        | 0.229   | 0.0000231       | 4.636     |
| Monocytes                      | 0.099   | 0.5847          | 0.233     |
| Stem Cells                     | 0.354   | 0.0368          | 1.434     |
| Stromal Cells                  | 0.627   | 0.00000000802   | 9.096     |
| Innate Lymphocytes             | 0.245   | 0.0569          | 1.245     |
| Macrophages                    | 0.446   | 0.0000268       | 4.572     |
| Dendritic Cells                | 0.331   | 0.0016          | 2.783     |
| Mast, Basophils and Eosinophil | 0.507   | 0.0043          | 2.368     |
| Granulocytes                   | 0.581   | 0.0036          | 2.438     |
| Patz1-Bcl6                     |         |                 |           |
| Cell Type                      | R-value | P-value (0.05)  | -log10(p) |
| B Cells                        | 0.077   | 0.5042          | 0.297     |
| T Cells                        | 0.248   | 0.00000435      | 5.361     |
| Monocytes                      | -0.086  | 0.6351          | 0.197     |
| Stem Cells                     | -0.024  | 0.8902          | 0.051     |
| Stromal Cells                  | 0.683   | 0.0000000000552 | 11.258    |
| Innate Lymphocytes             | 0.157   | 0.2259          | 0.646     |
| Macrophages                    | 0.097   | 0.3844          | 0.415     |
| Dendritic Cells                | -0.361  | 0.0005          | 3.263     |
| Mast, Basophils and Eosinophil | -0.573  | 0.0009          | 3.027     |
| Granulocytes                   | 0.637   | 0.0011          | 2.964     |

| Bcl6-Miz1                      |         |                |           |
|--------------------------------|---------|----------------|-----------|
| Cell Type                      | R-value | P-value (0.05) | -log10(p) |
| B Cells                        | -0.194  | 0.0896         | 1.048     |
| T Cells                        | 0.356   | 0.000000000201 | 10.698    |
| Monocytes                      | -0.122  | 0.5002         | 0.301     |
| Stem Cells                     | 0.176   | 0.3106         | 0.508     |
| Stromal Cells                  | 0.197   | 0.0845         | 1.073     |
| Innate Lymphocytes             | 0.603   | 0.000000270    | 6.569     |
| Macrophages                    | 0.336   | 0.0021         | 2.688     |
| Dendritic Cells                | 0.046   | 0.6699         | 0.174     |
| Mast, Basophils and Eosinophil | -0.026  | 0.8896         | 0.051     |
| Granulocytes                   | 0.598   | 0.0026         | 2.585     |
| LRF-ThPOK                      |         |                |           |
| Cell Type                      | R-value | P-value (0.05) | -log10(p) |
| B Cells                        | 0.675   | 0.000000000121 | 10.916    |
| T Cells                        | -0.185  | 0.0007         | 3.158     |
| Monocytes                      | 0.036   | 0.8425         | 0.074     |
| Stem Cells                     | 0.334   | 0.0501         | 1.301     |
| Stromal Cells                  | 0.370   | 0.0009         | 3.061     |
| Innate Lymphocytes             | 0.455   | 0.0002         | 3.636     |
| Macrophages                    | 0.132   | 0.2360         | 0.627     |
| Dendritic Cells                | -0.080  | 0.4601         | 0.337     |
| Mast, Basophils and Eosinophil | 0.479   | 0.0074         | 2.131     |
| Granulocytes                   | 0.499   | 0.0152         | 1.817     |

Figure S2

bioRxiv preprint doi: <https://doi.org/10.1101/2021.12.17.472994>; this version posted January 13, 2022. The copyright holder for this preprint (which was not certified by peer review) is the author/funder, who has granted bioRxiv a license to display the preprint in perpetuity. It is made available under aCC-BY-NC-ND 4.0 International license.

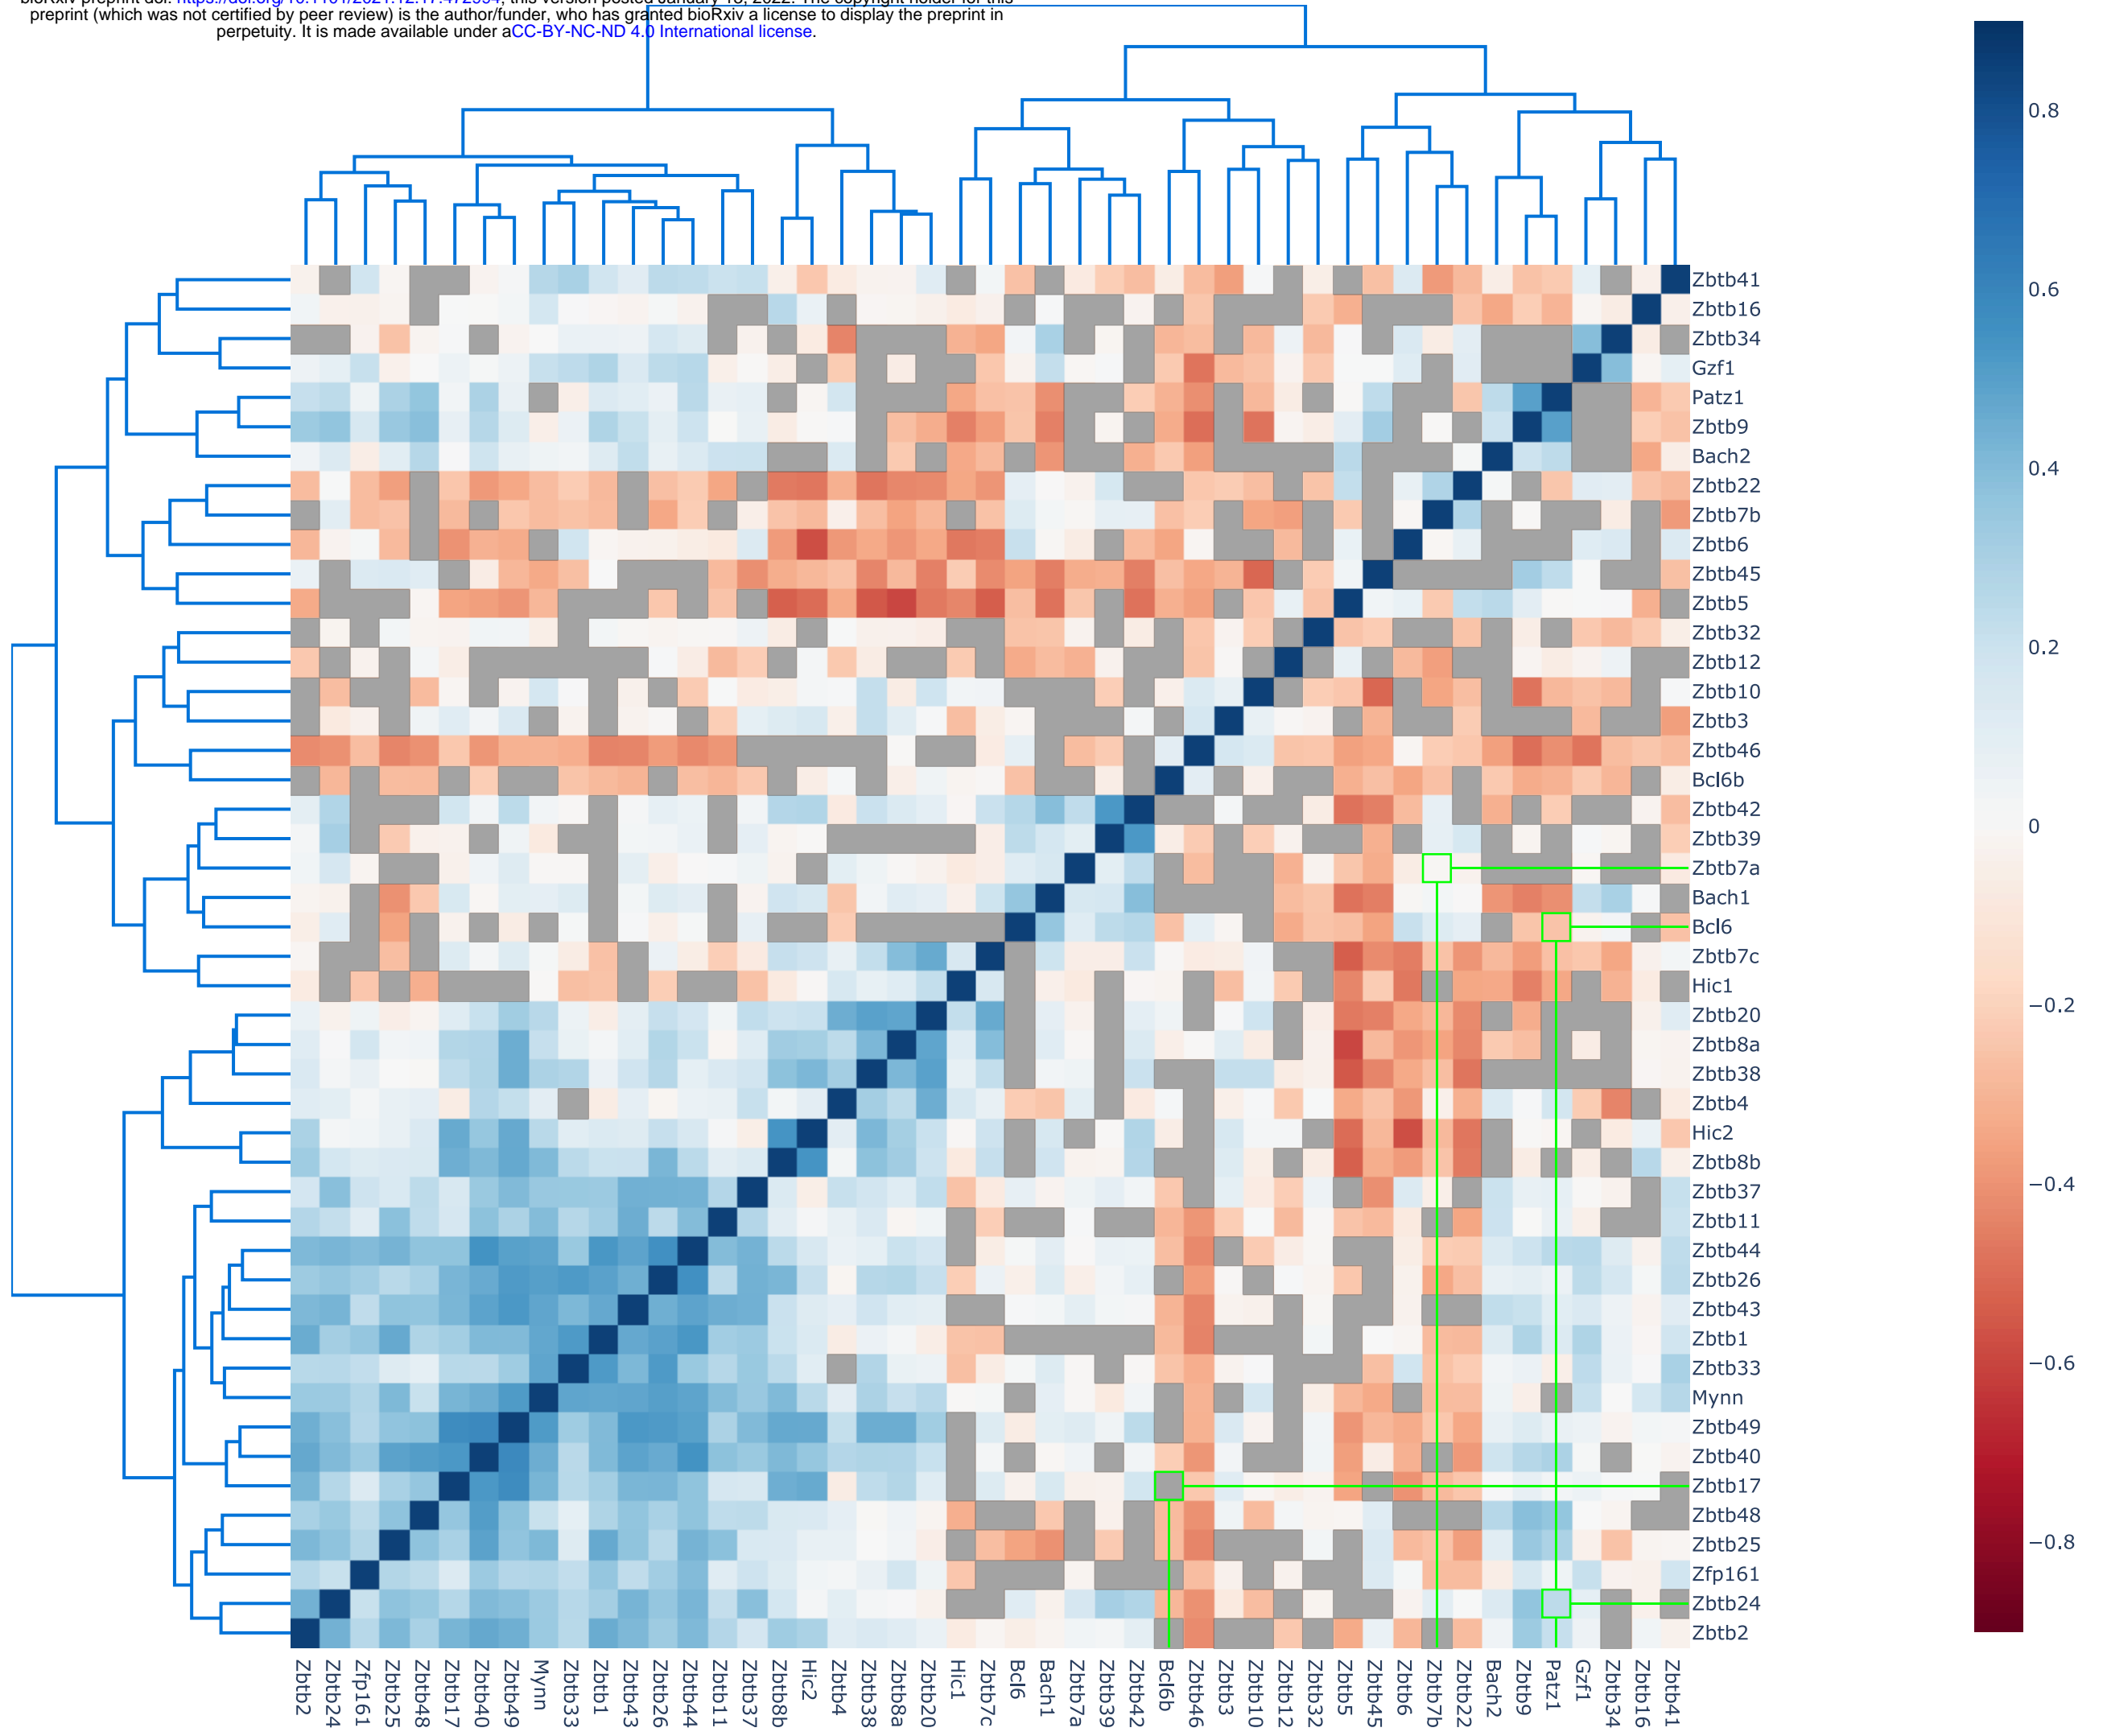



## Figure S3

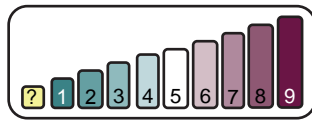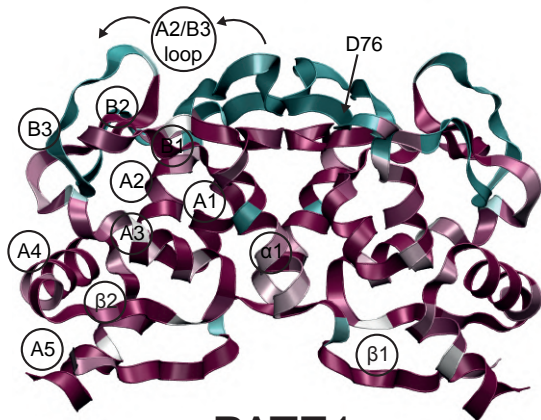

PATZ1

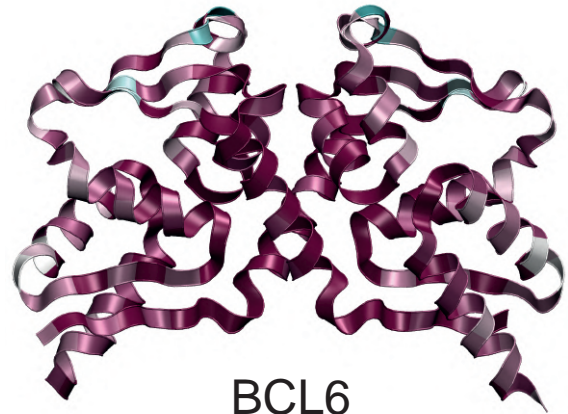

BCL6

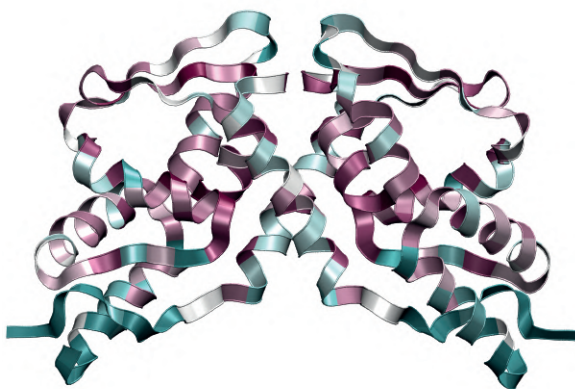

PATZ2

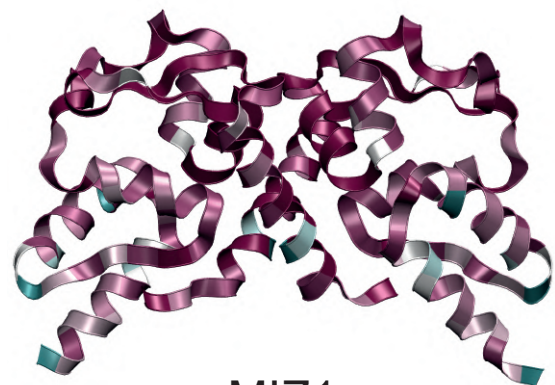

MIZ1

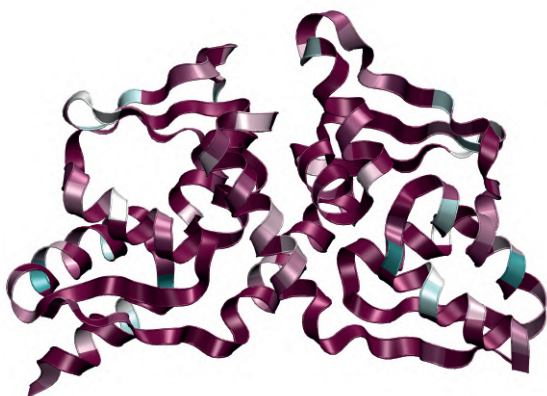

LRF

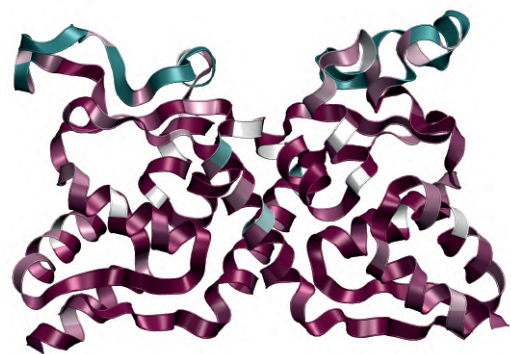

ThPOK

# Figure S4

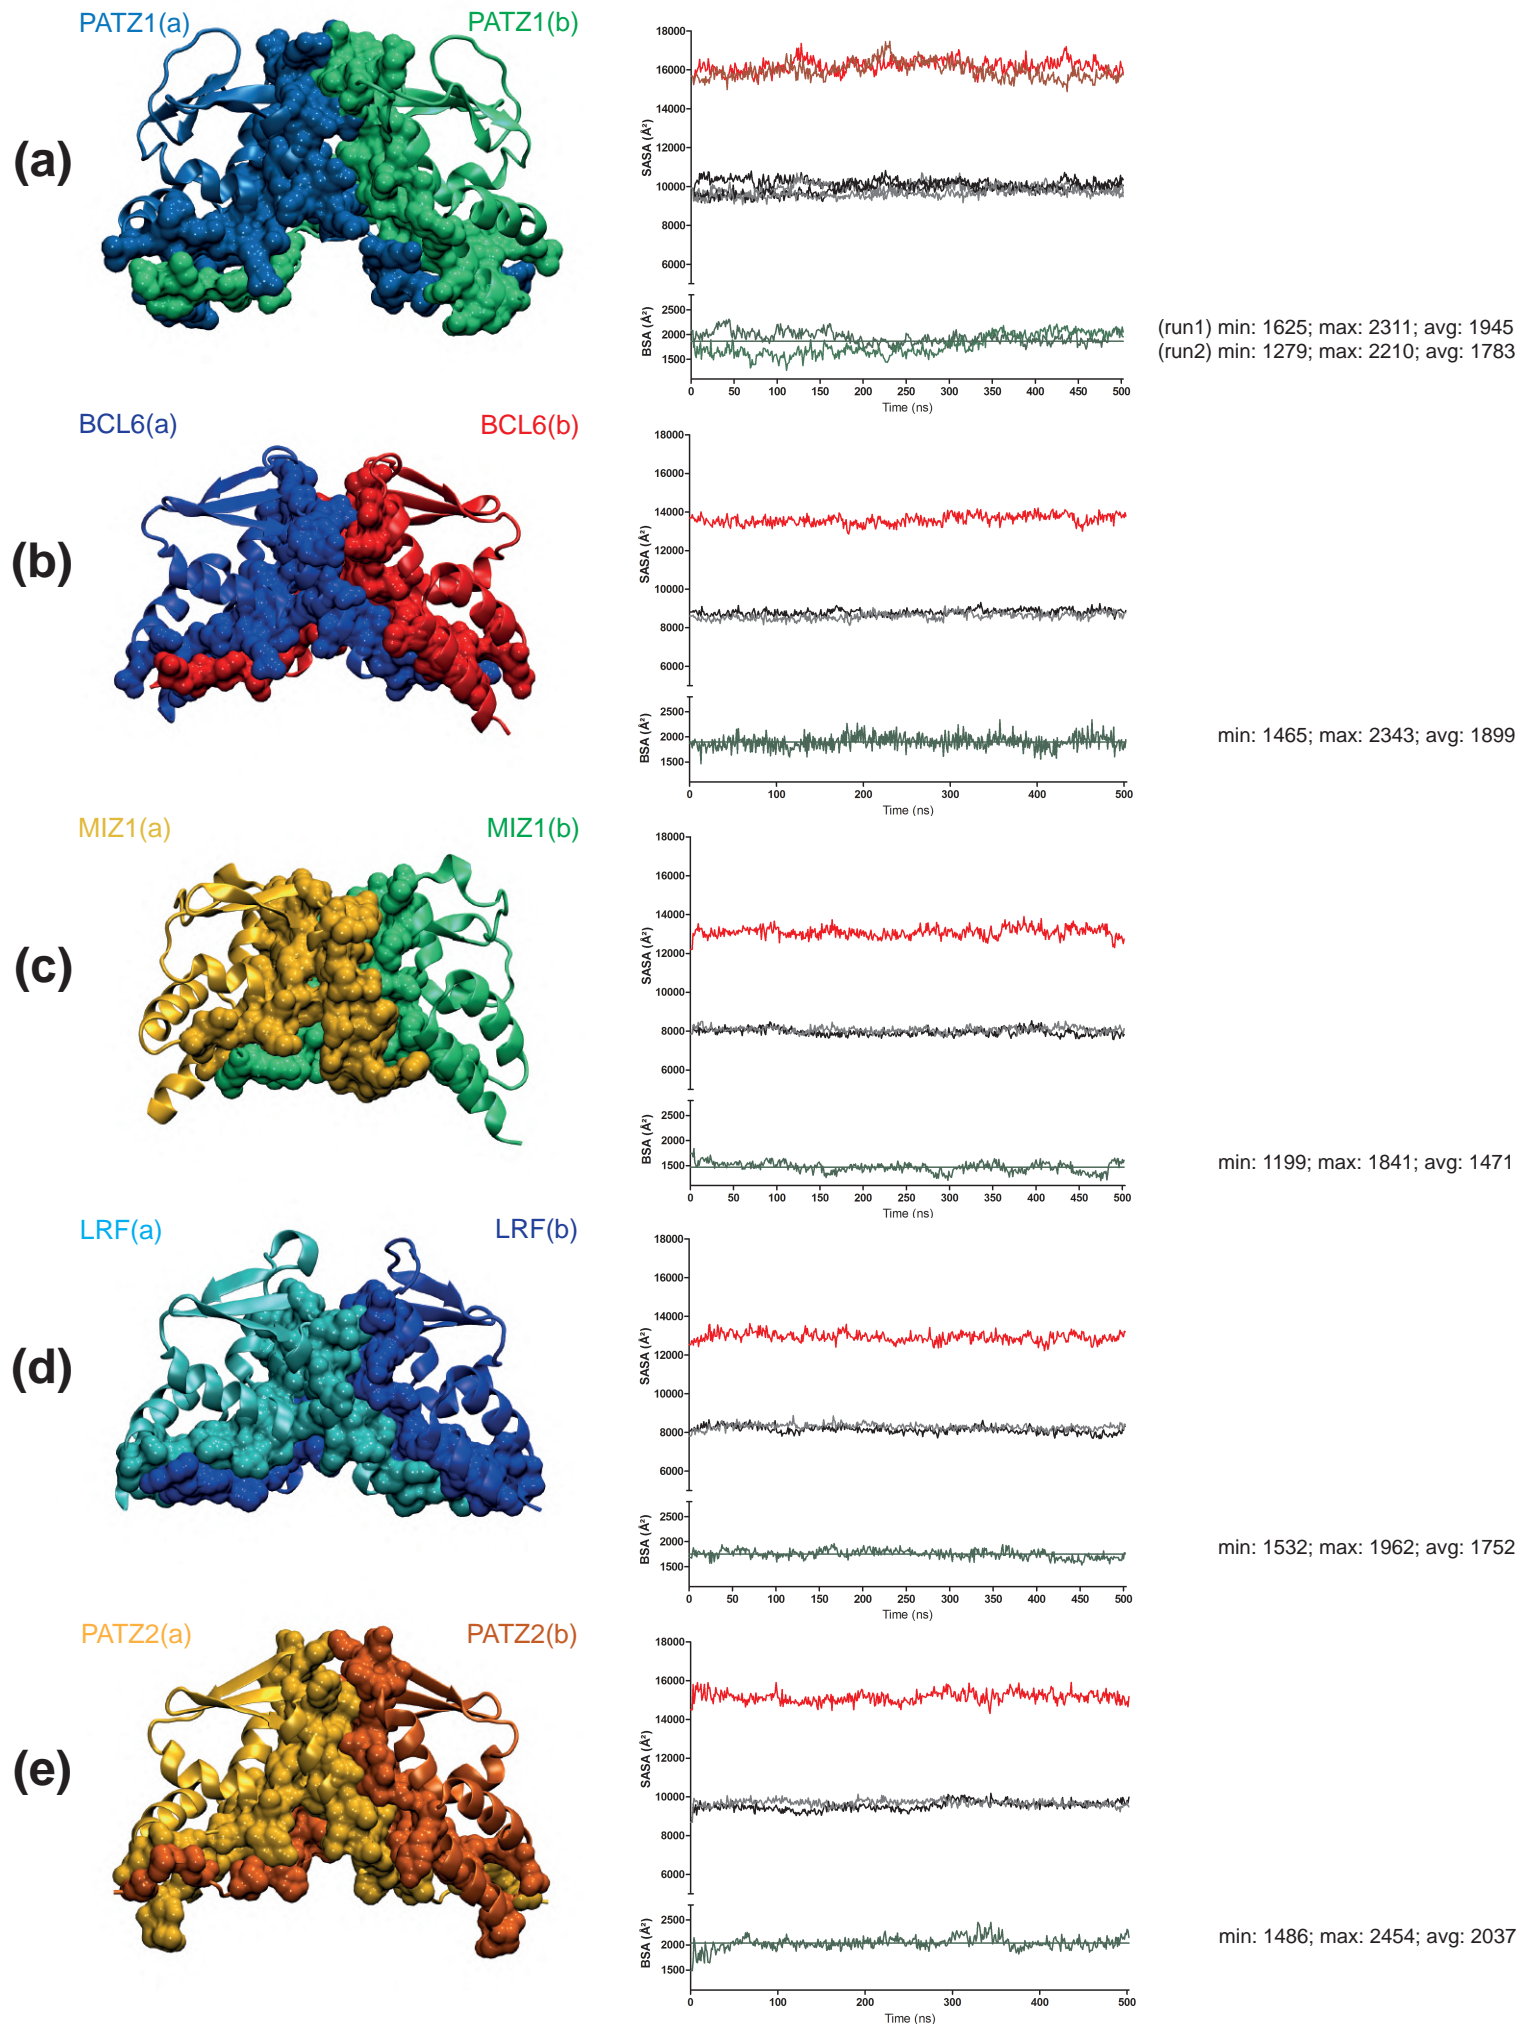



# Figure S5

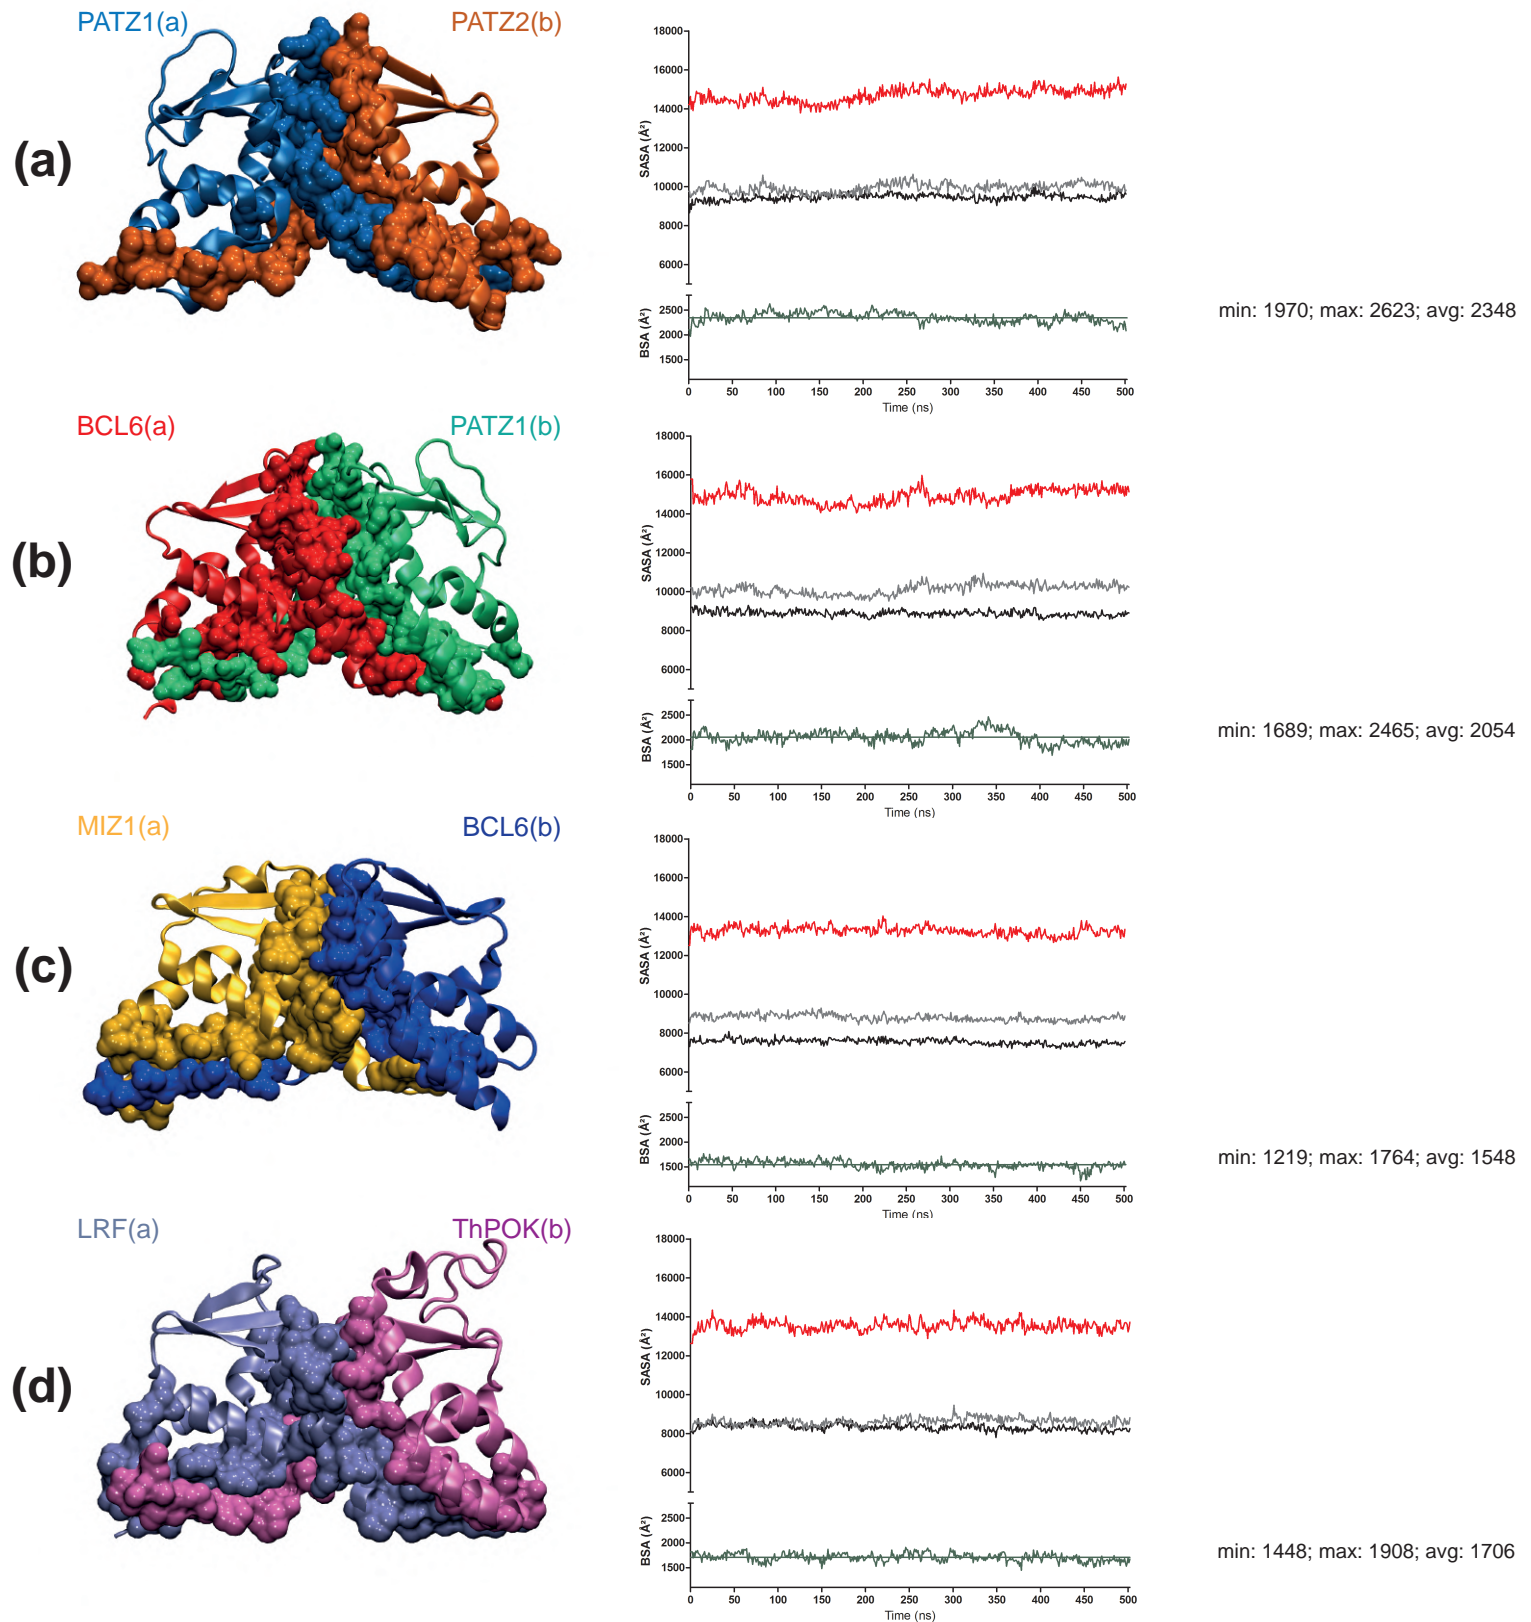

Figure S6

bioRxiv preprint doi: <https://doi.org/10.1101/2021.12.17.472994>; this version posted January 13, 2022. The copyright holder for this preprint (which was not certified by peer review) is the author/funder, who has granted bioRxiv a license to display the preprint in perpetuity. It is made available under aCC-BY-NC-ND 4.0 International license.

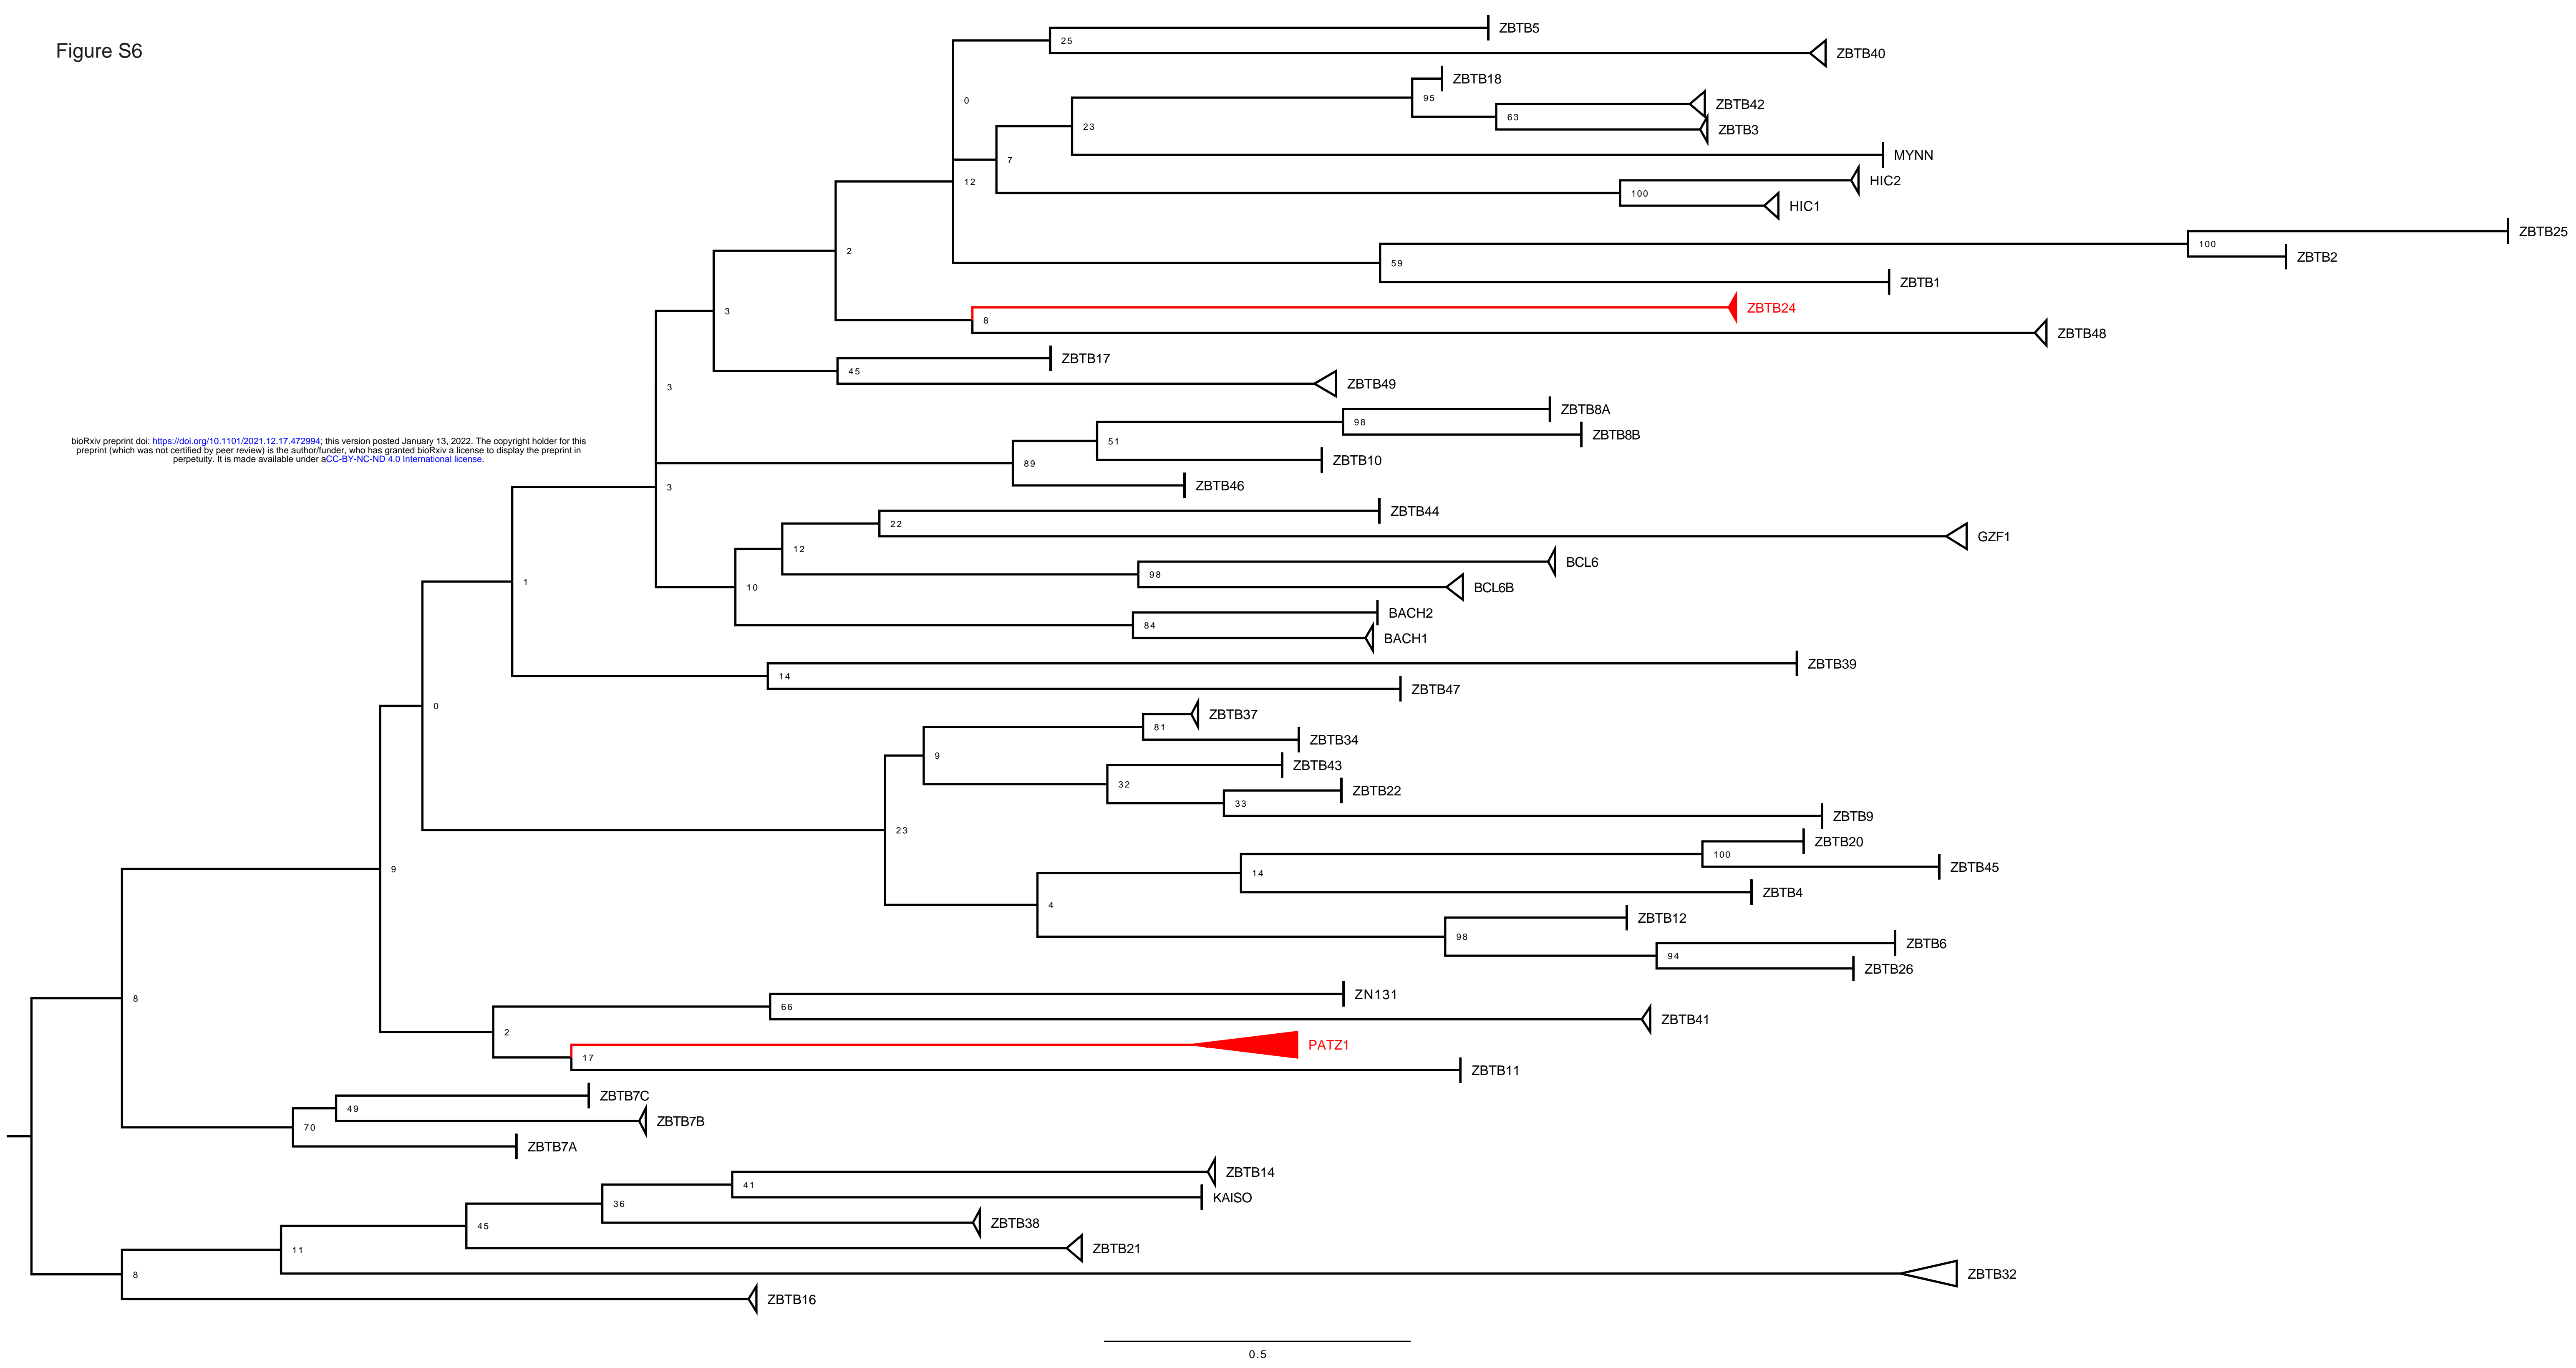

Source: https://www.biorxiv.org/content/10.1101/2021.12.17.472994v2.full.pdf
